# Supplementary material for: Metallocenium incorporated charge-enhanced thiourea catalysts
Source: Royal Society of Chemistry journal article supplement (doi:10.1039/d3ob02007j), 2024-01-01
Supplement: d3ob02007j1.pdf [file d3ob02007j1.pdf]

## Metalloceium Incorporated Charge-Enhanced Thiourea Catalysts

Daniel R. Blechschmidt, Cal Mergendahl, and Steven R. Kass\*

Department of Chemistry, University of Minnesota, 207 Pleasant Street SE, Minneapolis, MN  
55455, USA

\*To whom correspondence should be addressed. E-mail: [kass@umn.edu](mailto:kass@umn.edu)

### Table of Contents

|                                                          |           |
|----------------------------------------------------------|-----------|
| 1. Experimental Section                                  | S2 – S9   |
| 2. Friedel-Crafts Kinetic Data                           | S9 – S15  |
| 3. NMR Spectra                                           | S16 – S24 |
| 4. X-ray Crystallographic Data                           | S25 – S41 |
| 5. Computed Structure, Energies, and Imaginary Frequency | S42       |
| 6. References                                            | S43       |

## Experimental section

**General.** All reaction glassware and NMR tubes were dried at 120 °C and cooled under a flow of argon or in a vacuum desiccator. Volumetric flasks and syringes were stored in a vacuum desiccator for at least 12 h before use. Neutral alumina and molecular sieves were activated in a kiln at 300 °C for at least 24 h. Potassium carbonate was dried at 120 °C for at least 24 h before use. NMR spectra were recorded on 400 and 500 MHz Bruker spectrometers, and chemical shifts are reported in ppm and referenced to solvent residual peaks as follows:  $\delta$  7.26 ( $^1\text{H}$ ,  $\text{CDCl}_3$ ), 5.32 and 53.84 ( $^1\text{H}$  and  $^{13}\text{C}$ ,  $\text{CD}_2\text{Cl}_2$ ), 1.94 ( $^1\text{H}$ ,  $\text{CD}_3\text{CN}$ ), and -78.5 ( $^{19}\text{F}$ , external calibrant). A relaxation delay of 10 s was employed for the tetrakis[3,5-bis(trifluoromethyl)phenyl]borate ( $\text{BAr}^{\text{F}}_4$ ) salts to obtain more accurate integrations. Due to the paramagnetism of the ferrocenium salt derivatives, their  $^1\text{H}$  and  $^{13}\text{C}$  NMR spectra were not obtained. High-resolution mass spectra were recorded with a Bruker ESI-BioTOF instrument using PEG and PPG standards in methanol. Melting points were obtained in unsealed tubes using an uncalibrated Thomas Hoover Uni-Melt apparatus. Fourier transform-infrared spectra were recorded with a Thermo-Nicollet iS 5 spectrometer equipped with a laminated diamond attenuated total reflection (ATR) attachment.

Chemicals were purchased from Oakwood Chemical and used without further purification. Solvents were acquired from Fischer Scientific. Acetone was used as delivered whereas the tetrahydrofuran, dichloromethane, and diethyl ether were degassed and dried with a Pure Process Technologies solvent purification system. Sodium  $\text{BAr}^{\text{F}}_4$  was purchased from AK Scientific as the 2.5 hydrate. It was dried by dissolving the salt in anhydrous methanol and pushing the solution through a plug of activated alumina using a syringe with a 0.45  $\mu\text{m}$  filter, and then removing the solvent under vacuum. The resulting solid was crushed into a fine powder and heated at 150 °C in a nitrogen glovebox for at least 16 h to yield the desired 0.5 hydrate. Deuterated solvents were

purchased from Cambridge Isotope Laboratories. Chloroform-*d* (CDCl<sub>3</sub>) was purified through a column of K<sub>2</sub>CO<sub>3</sub> and activated neutral alumina. Hexanes, dichloromethane-*d*<sub>2</sub> (CD<sub>2</sub>Cl<sub>2</sub>), and dimethylsulfoxide-*d*<sub>6</sub> (DMSO-*d*<sub>6</sub>) were dried over 3Å molecular sieves for 24 h before use.

**1-Methyl-3-(3-phenylthioureido)pyridinium tetrakis(3,5-bis(trifluoromethyl)phenyl)borate**

**(2).** This compound was prepared following the literature procedure by Fan and Kass.<sup>11</sup> <sup>1</sup>H NMR (500 MHz, CD<sub>2</sub>Cl<sub>2</sub>) δ 9.92 (s, 1H), 8.27 (brs, 1H), 8.16 (d, *J* = 6.0 Hz, 1H), 8.08 (d, *J* = 8.4 Hz, 1H), 7.87 (dd, *J* = 8.6, 6.0 Hz, 1H) 7.82 (brs, 1H), 7.72 (brs, 8H), 7.58 – 7.55 (m, 6H), 7.49 (tt, *J* = 2.2, 7.5 Hz, 1H), 7.36 (d, *J* = 7.2 Hz, 2H), 4.38 (s, 3H).

**Iodoferrocene (7).** This compound was prepared according to the literature procedure by Roemer and Nijhuis.<sup>15</sup> At 12 g scale the purification from Kuibiak and coworkers was used in lieu of the sublimation procedure.<sup>16</sup> <sup>1</sup>H NMR (500 MHz, CDCl<sub>3</sub>) δ 4.41 (t, *J* = 1.9 Hz, 2H), 4.19 (s, 5H), 4.16 (t, *J* = 1.9 Hz, 2H).

**Aminoferrocene (8a).** This compound was prepared using the literature procedure by Gasser and coworkers.<sup>17</sup> <sup>1</sup>H NMR (500 MHz, CD<sub>2</sub>Cl<sub>2</sub>) δ 4.10 (s, 5H), 3.99 (t, *J* = 1.9 Hz), 3.84 (t, *J* = 1.9 Hz, 2H), 2.59 (brs, 2H).

***N*-Ferrocenyl-*N'*-phenylthiourea (9a).** Phenylisothiocyanate (36.4 mg, 0.269 mmol) was added to a solution of aminoferrocene (50.0 mg, 0.249 mmol) in DCM (2.5 mL) under argon atmosphere. The reaction mixture was stirred for 5 hr under argon, and then the solvent was removed under reduced pressure. The residue was purified via silica gel flash chromatography with 5% methanol in methylene chloride to afford 81.9 mg (97%) of the product as a light orange powder (mp 135.3 – 142.5 °C with decomposition). <sup>1</sup>H NMR (500 MHz, CD<sub>2</sub>Cl<sub>2</sub>) δ 8.37 (s, 1H), 7.48 (d, *J* = 7.9 Hz, 2H), 7.40 (t, *J* = 7.9 Hz, 2H), 7.32 (brs, 1H), 7.26 (t, *J* = 7.4 Hz, 1H), 4.42 (brs, 2H), 4.31 (s, 5H), 4.23 (brs, 2H). <sup>13</sup>C NMR (101 MHz, DMSO-*d*<sub>6</sub>) δ 180.4, 139.8, 129.0, 125.1, 124.0, 95.0, 69.5,

65.5, 55.1. IR-ATR 3348, 3236, 3172, 3080, 3024, 1593, 1555, 1522, 1495, 1469, 1447, 1406, 1374, 1345, 1279, 1217, 1197, 1170, 1104, 820, 743, 693  $\text{cm}^{-1}$ . ESI-HRMS calcd for  $\text{C}_{17}\text{H}_{16}\text{FeN}_2\text{SNa}$  ( $\text{M} + \text{Na}$ )<sup>+</sup> 359.0281, found: 359.0279.

***N*-Ferrocenium-*N'*-phenylthiourea tetrakis[3,5-bis(trifluoromethyl)phenyl]borate (4a).** *N*-Ferrocenyl-*N'*-phenylthiourea (50.0 mg, 0.149 mmol) was dissolved in dichloromethane (50 mL), and silver tetrafluoroborate (29.0 mg, 0.149 mmol) in 50 mL of DCM was added dropwise with exclusion of light, under argon. After stirring for 5 min, the reaction mixture was passed through a 0.2  $\mu\text{m}$  syringe filter into a vial and 132 mg (0.149 mmol) of sodium tetrakis[3,5-bis(trifluoromethyl)phenyl]borate was added. The solution was stirred overnight, filtered through a syringe filter, and concentrated under reduced pressure to afford 72 mg (75%) of product as a dark green precipitate (mp 155.2 – 157.5 °C). <sup>19</sup>F NMR (471 MHz,  $\text{CD}_2\text{Cl}_2$ ) -62.89 (s). ESI-HRMS calcd for  $\text{C}_{17}\text{H}_{16}\text{FeN}_2\text{S}$  ( $\text{M} - \text{BAr}^{\text{F}_4}$ )<sup>+</sup> 336.0379, found 336.0396.

**Aminomethylferrocene (8b).** Ferrocene aldehyde was subjected to the literature procedure by Huikai and coworkers to yield the oxime.<sup>19</sup> This crude intermediate was subjected to the procedure developed by Evans et al. to afford the title compound.<sup>18</sup> <sup>1</sup>H NMR (500 MHz,  $\text{CDCl}_3$ )  $\delta$  4.16 (t,  $J$  = 1.9 Hz, 2H), 4.14 (s, 5H), 4.11 (t,  $J$  = 1.8 Hz), 3.55 (s, 2H), 1.37 (brs, 2H).

***N*-Methylferrocenyl-*N'*-phenylthiourea (9b).** Aminomethylferrocene (450 mg, 2.09 mmol) was dissolved in 21 mL of dry  $\text{CH}_2\text{Cl}_2$ , and then phenylisothiocyanate (306 mg, 270  $\mu\text{L}$ , 2.25 mmol) was added dropwise with constant stirring. After addition, the reaction mixture was stirred for an additional 4 hrs. The solvent was then removed under reduced pressure, and purification of the residue was accomplished via silica gel column chromatography with hexane (5 min), a ramp to 100% EtOAc (15 min) and a 15 min hold time to elute 592 mg of the orange solid product (81%, mp 152.5 – 153.7°C). <sup>1</sup>H NMR (500 MHz,  $\text{CDCl}_3$ )  $\delta$  7.92 (brs, 1H), 7.49 (t,  $J$  = 7.9 Hz, 2H), 7.35

(tt,  $J = 7.5, 1.3$  Hz, 1H), 7.31 (d,  $J = 7.0$  Hz, 2H), 6.26 (brs, 1H), 4.43 (d,  $J = 4.6$  Hz, 2H), 4.11 (t,  $J = 1.9$  Hz, 2H), 4.08 (t,  $J = 1.9$  Hz, 2H), 3.88 (s, 5H).  $^{13}\text{C}$  NMR (MHz,)  $\delta$  180.2, 136.1, 130.6, 128.0, 126.1, 84.4, 68.4, 68.3, 67.6, 44.9. IR-ATR 3357, 3165, 3096, 3010, 2969, 2923, 2869, 1589, 1526, 1452, 1405, 1386, 1359, 1321, 1306, 1291, 1257, 1192, 1103, 998, 815, 754, 698  $\text{cm}^{-1}$ .  
<sup>1</sup>. ESI-HRMS calcd for  $\text{C}_{18}\text{H}_{18}\text{FeN}_2\text{NaS}$  ( $\text{M} + \text{Na}$ )<sup>+</sup> 373.0433, found 373.0456.

**Cobaltocenium hexafluorophosphate (11).** This compound was prepared according to the literature procedure by Vanicek and coworkers.<sup>20</sup>  $^1\text{H}$  NMR (400 MHz,  $\text{CD}_3\text{CN}$ )  $\delta$  5.67 (s, 10H).

**Aminocobaltocenium hexafluorophosphate (12).** This compound was prepared following the literature procedure by Jochriem and coworkers.<sup>21</sup>  $^1\text{H}$  NMR (500 MHz,  $\text{CD}_3\text{CN}$ )  $\delta$  5.37 (s, 5H), 5.28 (t,  $J = 2.2$  Hz, 2H), 5.17 (t,  $J = 2.2$  Hz, 2H), 4.93 (brs, 2H).

***N*-Cobaltocenium-*N'*-phenylthiourea hexafluorophosphate (13).** A 60% dispersion of sodium hydride in mineral oil (17.2 mg, 0.430 mmol) was washed with pentane (3 x 2 mL) and cooled to 0 °C. A solution of aminocobaltocenium hexafluorophosphate (100 mg, 0.286 mmol) in THF (2 mL) was added, and the mixture was stirred for 1 hr until hydrogen evolution stopped. Phenylisothiocyanate (42.6 mg, 0.315 mmol) was added, and the solution was warmed to room temperature. A 55% wt/wt aqueous solution (46  $\mu\text{L}$ ) of hexafluorophosphoric acid (41.8 mg, 0.286 mmol) was added to the reaction mixture and then the solvent was removed under reduced pressure. The resulting residue was dissolved in minimal dichloromethane and triturated into diethyl ether to afford 87.8 mg (63%) of an orange powder. X-ray crystallographic quality crystals were grown via vapor diffusion of diethyl ether into a solution of *N*-cobaltocenium-*N'*-phenylthiourea hexafluorophosphate in 1,2-dichloroethane (mp 159.8 – 164.9 °C).  $^1\text{H}$  NMR (400 MHz,  $\text{CD}_2\text{Cl}_2$ )  $\delta$  8.46 (s, 1H), 8.28 (s, 1H), 7.55 (d,  $J = 7.5$  Hz, 2H), 7.41 (t,  $J = 7.9$  Hz, 2H), 7.28 (t,  $J = 7.4$  Hz, 1H), 6.44 (t,  $J = 2.2$  Hz, 2H), 5.63 (s, 5H), 5.39 (t,  $J = 2.2$  Hz, 2H).  $^{13}\text{C}$  NMR (101

MHz, DMSO-*d*<sub>6</sub>) δ 179.1, 138.4, 128.9, 125.6, 123.9, 115.4, 84.6, 79.3, 73.9. <sup>19</sup>F NMR (376 MHz, CD<sub>2</sub>Cl<sub>2</sub>) δ -69.95 (s), -71.85 (s). IR-ATR 3648, 3376, 3127, 2928, 2851, 1713, 1582, 1540, 1495, 1370, 1320, 1243, 1200, 837, 742 cm<sup>-1</sup>. HRMS-ESI calcd for C<sub>17</sub>H<sub>16</sub>CoN<sub>2</sub>S (M – PF<sub>6</sub>)<sup>+</sup> 339.0361, found 339.0362.

***N*-Cobaltocenium-*N'*-phenylthiourea tetrakis[3,5-bis(trifluoromethyl)phenyl]borate (5).** *N*-Cobaltocenium-*N'*-phenylthiourea hexafluorophosphate (0.0500 g, 0.103 mmol) and sodium tetrakis[3,5-bis(trifluoromethyl)phenyl]borate (0.0984 g, 0.114 mmol) were dissolved in 1 mL of anhydrous DCM under argon, and the reaction mixture was stirred overnight. Filtration of the solid precipitate and removal of the solvent under reduced pressure afforded 114 mg (92%) of a yellow solid (mp 141 – 143 °C). <sup>1</sup>H NMR (500 MHz, CD<sub>3</sub>CN) δ 8.56 (brs, 2H), 7.70 (m, 8H), 7.67 (brs, 4H), 7.46 (t, *J* = 7.5 Hz, 2H), 7.41 (d, *J* = 7.0 Hz, 2H), 7.33 (t, *J* = 7.5 Hz, 1H), 6.23 (t, *J* = 2.5 Hz, 2H), 5.62 (s, 5H), 5.46 (t, *J* = 2.5 Hz, 2H). <sup>13</sup>C NMR (126 MHz, CD<sub>3</sub>CN) δ 180.7, 162.6 (q, <sup>1</sup>*J*<sub>B-C</sub> = 50 Hz), 135.7, 130.4, 129.9 (qq, <sup>3</sup>*J*<sub>B-C</sub> = 15 Hz, <sup>2</sup>*J*<sub>F-C</sub> = 125 Hz), 128.1, 126.4, 125.5 (q, <sup>1</sup>*J*<sub>F-C</sub> = 272 Hz), 118.7 (septet, *J* = 3.8 Hz), 116.2, 85.9, 80.4, 75.2 [1 line missing]. <sup>19</sup>F NMR (470 MHz, CD<sub>3</sub>CN) δ -63.24 (s); IR-ATR 3362, 3194, 3136, 2998, 2955, 1569, 1493, 1354, 1279, 1170, 1136, 891, 753 cm<sup>-1</sup>. HRMS-ESI calcd for C<sub>17</sub>H<sub>16</sub>CoN<sub>2</sub>S (M – BAr<sup>F</sup><sub>4</sub>)<sup>+</sup> 339.0361, found 339.0357.

**General procedure for Friedel-Crafts kinetics.** *N*-Methylindole (6.3 μL, 6.6 mg, 0.050 mmol), *trans*-β-nitrostyrene (74.6 mg, 0.50 mmol), and the appropriate catalyst (0.005 mmol) were added to a 1 mL volumetric flask and filled to the mark with CD<sub>2</sub>Cl<sub>2</sub>. This solution was mixed and then added to an oven-dried NMR tube, which was sealed with a cap, electrical tape, and parafilm to prevent evaporation of the solvent over the course of the experiment. <sup>1</sup>H NMR spectra were collected at intermittent times and the samples were maintained at 27 °C. Temperature was controlled via the NMR spectrometer or when processes were monitored longer than one hour, a

water bath was used. Reaction progress was followed using the signals at  $\delta$  6.47 (*N*-methylindole) and 5.17, 5.08, and 4.98 (alkylation product). Rate constants and half-lives were determined from a linear least squares fit of the data using a pseudo-first-order kinetic model.

**General procedure for the Friedel-Crafts kinetics with in-situ generated 4a and 4b.** *N*-Ferrocenyl-*N'*-phenylthiourea (8.4 mg, 0.025 mmol) or *N*-methylferrocenyl-*N'*-phenylthiourea (5.25 mg, 0.025 mmol), NaBAR<sup>F</sup><sub>4</sub> (22.1 mg, 0.025 mmol), and AgBF<sub>4</sub> (4.9 mg, 0.025 mmol) were added to a 6-dram vial charged with a stir bar under an argon atmosphere. Dichloromethane-d<sub>2</sub> (5 mL) was added via syringe, and the reaction mixture was stirred for 5 min with the exclusion of light. *N*-Methylindole (6.3  $\mu$ L, 6.6 mg, 0.050 mmol) and *trans*- $\beta$ -nitrostyrene (74.6 mg, 0.500 mmol) were added to a 1 mL volumetric flask under argon, and the dichloromethane solution was filtered through a 0.2  $\mu$ m syringe filter into the volumetric up to the mark. This mixture was then transferred to an NMR tube, which was sealed with a cap, electrical tape, and parafilm to prevent evaporation of the solvent over the course of the experiment. <sup>1</sup>H NMR spectra were collected at intermittent times, and reaction progress was followed using the signals at  $\delta$  6.47 (*N*-methylindole) and 5.17, 5.08, and 4.98 (alkylation product). Rate constants and half-lives were determined from a linear least squares fit of the data using a pseudo-first-order kinetic model.

**General procedure for the Friedel-Crafts substrate scope with catalyst 4a.** Indole (6.0 mg, 0.051 mmol), 5-methoxyindole (7.4 mg, 0.050 mmol), 5-chloroindole (7.6 mg, 0.050 mmol) or *N*-methylindole (6.2  $\mu$ L, 6.5 mg, 0.049 mmol) and *trans*- $\beta$ -nitrostyrene (14.9 mg, 0.100 mmol), *trans*-2-chloro- $\beta$ -nitrostyrene (18.4 mg, 0.100 mmol), *trans*-3-bromo- $\beta$ -nitrostyrene (22.8 mg, 0.100 mmol) or *trans*-4-methoxy- $\beta$ -nitrostyrene (17.9 mg, 0.100 mmol) were placed in an oven-dried vial which was then sealed, evacuated, and backfilled with argon. In a separate vial under inert atmosphere, 6.7 mg (0.020 mmol) of *N*-ferrocenyl-*N'*-phenylthiourea, 4.3 mg (0.022 mmol)

of AgBF<sub>4</sub>, and 19.7 mg (0.022 mmol) of dried NaBAR<sup>F</sup><sub>4</sub> were combined to give a solid precatalyst mixture. Dry dichloromethane (4.0 mL) was added to the vial containing the precatalyst mixture, which was then shaken for 5 min in the absence of light. The resulting green solution was filtered through a 25 mm, 0.2 μm syringe filter and ¼ of the catalyst solution was added to the vial containing indole and *trans*-β-nitrostyrene. It was subsequently shaken for 10 s to dissolve the reactants before being placed in a water bath at 27 °C for 24 h. After the reaction time elapsed, the solvent was removed under reduced pressure with a rotary evaporator, and the residual material was redissolved in a stock solution of mesitylene in 0.6 mL of CDCl<sub>3</sub> as an internal standard. Reaction conversions and yields were calculated from NMR integrations of the indole, alkylation product, and mesitylene ratios.<sup>26d</sup>

**General procedure for the solvent-free Friedel-Crafts substrate scope with catalyst 5.** Indole (6.0 mg, 0.051 mmol), 5-methoxyindole (7.4 mg, 0.050 mmol), 5-chloroindole (7.6 mg, 0.050 mmol) or *N*-methylindole (6.2 μL, 6.5 mg, 0.049 mmol) and *trans*-β-nitrostyrene (14.9 mg, 0.100 mmol), *trans*-2-chloro-β-nitrostyrene (18.4 mg, 0.100 mmol), *trans*-3-bromo-β-nitrostyrene (22.8 mg, 0.100 mmol) or *trans*-4-methoxy-β-nitrostyrene (17.9 mg, 0.100 mmol) were added to an oven-dried vial along with catalyst **5** (6.0 mg, 0.0050 mmol) and the reaction mixture was shaken until the solid material was well combined before being evacuated and backfilled with argon. When *N*-methylindole (6.2 μL, 6.5 mg, 0.049 mmol) was used it was added at this point, and in both instances the vial was transferred to a water bath at 27 °C for 24 h. The contents were then dissolved in CDCl<sub>3</sub> and analyzed via <sup>1</sup>H NMR spectroscopy. All of the product spectra can be found in ref. 26d.

**Computations.** A B3LYP/6-31G(d,p)<sup>S1,S2</sup> transition structure optimization for the Friedel–Crafts alkylation of indole with *trans*-β-nitrostyrene catalyzed by cobaltocenium ion **5**<sup>+</sup> was carried out



using Gaussian 16 at the Minnesota Supercomputer Institute for Advanced Computational Research.<sup>S3</sup> Vibrational frequencies were subsequently computed, and the resulting structure was found to have one imaginary frequency as required for a stationary point that corresponds to a transition state. All of these calculations were carried out with the default ultrafine integration grid.

### Friedel-Crafts kinetic data

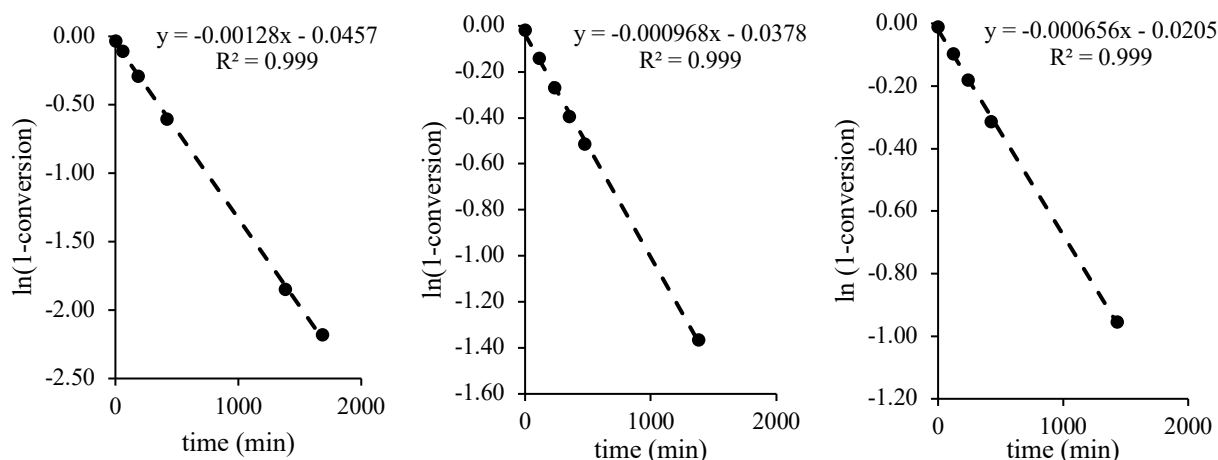

| Trial 1    |        |                       | Trial 2    |        |                       | Trial 3    |         |                       |
|------------|--------|-----------------------|------------|--------|-----------------------|------------|---------|-----------------------|
| time (min) | conv.  | $\ln(1-\text{conv.})$ | time (min) | conv.  | $\ln(1-\text{conv.})$ | time (min) | conv.   | $\ln(1-\text{conv.})$ |
| 0.00       | 0.0323 | -0.0328               | 0.00       | 0.0164 | -0.0165               | 0.00       | 0.00990 | -0.0100               |
| 59.6       | 0.102  | -0.107                | 112        | 0.130  | -0.140                | 119        | 0.0909  | -0.0953               |
| 180        | 0.250  | -0.288                | 232        | 0.235  | -0.267                | 239        | 0.164   | -0.180                |
| 419        | 0.453  | -0.602                | 351        | 0.324  | -0.392                | 421        | 0.268   | -0.312                |
| 1378       | 0.842  | -1.84                 | 472        | 0.401  | -0.513                | 1430       | 0.614   | -0.953                |
| 1680       | 0.886  | -2.18                 | 1379       | 0.744  | -1.36                 |            |         |                       |

**Fig. S1** Kinetic plots and data tables for the Friedel-Crafts reaction between *N*-methylindole and *trans*- $\beta$ -nitrostyrene catalyzed by isolated *N*-ferrocenium-*N'*-phenylthiourea tetrakis-[3,5-bis(trifluoro-methyl)phenyl]borate ( $\text{BAr}^{\text{F}_4}$ ) (**4a**).

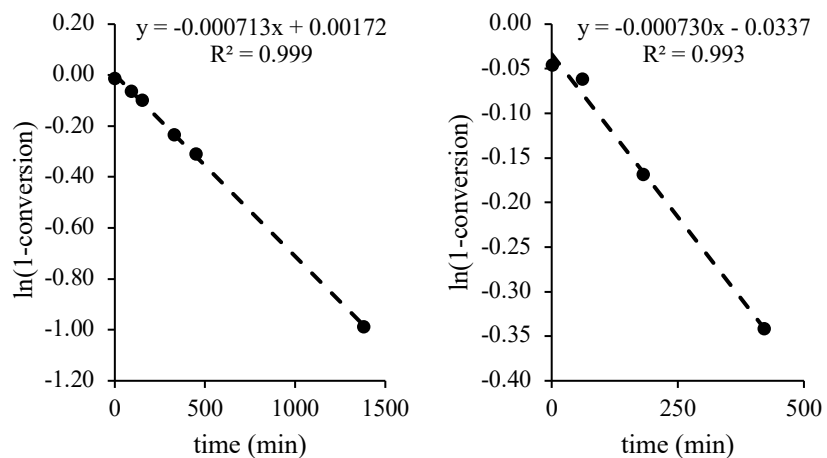

| Trial 1    |        |                       | Trial 2    |        |                       |
|------------|--------|-----------------------|------------|--------|-----------------------|
| time (min) | conv.  | $\ln(1-\text{conv.})$ | time (min) | conv.  | $\ln(1-\text{conv.})$ |
| 0.00       | 0.0132 | -0.0132               | 0.00       | 0.0446 | -0.0456               |
| 88.0       | 0.0596 | -0.0614               | 60.0       | 0.0596 | -0.061                |
| 145        | 0.0937 | -0.0983               | 181        | 0.155  | -0.168                |
| 327        | 0.208  | -0.234                | 420        | 0.289  | -0.341                |
| 446        | 0.265  | -0.307                |            |        |                       |
| 1377       | 0.627  | -0.987                |            |        |                       |

**Fig. S2** Kinetic plots of the Friedel-Crafts reaction between *N*-methylindole and *trans*- $\beta$ -nitrostyrene catalyzed by *N*-cobaltocenium-*N'*-phenylthiourea  $\text{BAR}^{\text{F}_4}$  (**5**).

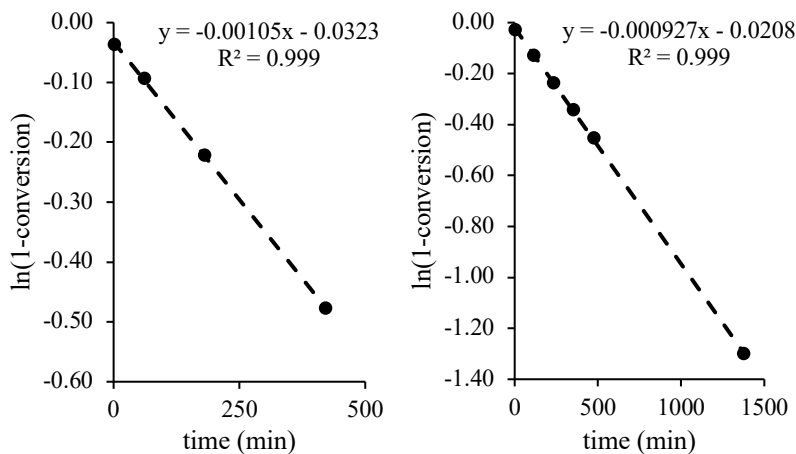

| Trial 1    |        |                       | Trial 2    |        |                       |
|------------|--------|-----------------------|------------|--------|-----------------------|
| time (min) | conv.  | $\ln(1-\text{conv.})$ | time (min) | conv.  | $\ln(1-\text{conv.})$ |
| 0.00       | 0.0354 | -0.0360               | 0.00       | 0.0260 | -0.0263               |
| 59.9       | 0.0881 | -0.092                | 112        | 0.120  | -0.128                |
| 181        | 0.198  | -0.220                | 231        | 0.208  | -0.234                |
| 420        | 0.379  | -0.476                | 351        | 0.289  | -0.341                |
|            |        |                       | 472        | 0.363  | -0.4511               |
|            |        |                       | 1373       | 0.727  | -1.30                 |

**Fig. S3** Kinetic plots of the Friedel-Crafts reaction between *N*-methylindole and *trans*- $\beta$ -nitrostyrene catalyzed by *N*-methylpyridinium-*N'*-phenylthiourea  $\text{BAr}^{\text{F}}_4$  (**2**).

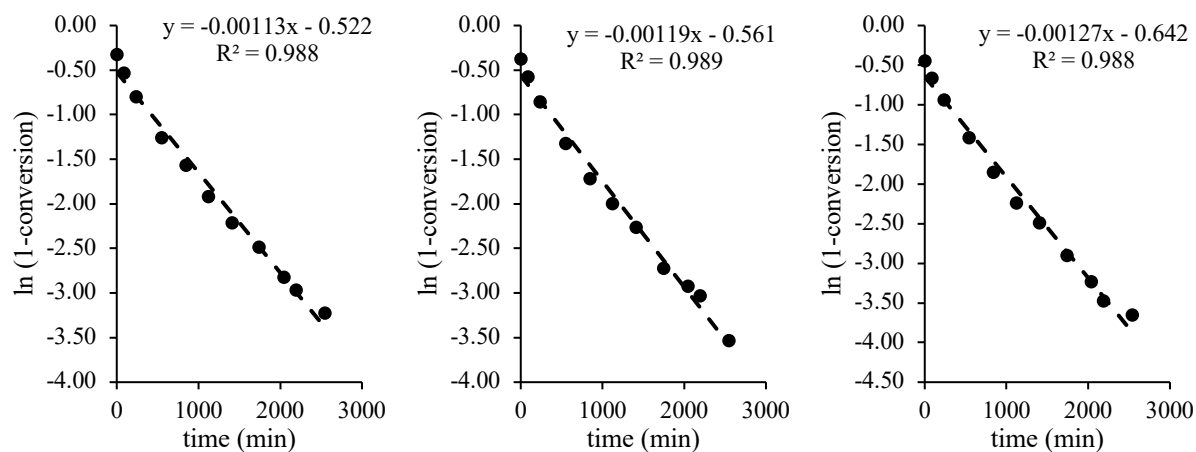

| Trial 1    |       |                       | Trial 2    |       |                       | Trial 3    |       |                       |
|------------|-------|-----------------------|------------|-------|-----------------------|------------|-------|-----------------------|
| time (min) | conv. | $\ln(1-\text{conv.})$ | time (min) | conv. | $\ln(1-\text{conv.})$ | time (min) | conv. | $\ln(1-\text{conv.})$ |
| 0.00       | 0.275 | -0.322                | 0.00       | 0.309 | -0.369                | 0.00       | 0.359 | -0.445                |
| 86.3       | 0.411 | -0.529                | 86.1       | 0.438 | -0.577                | 85.4       | 0.483 | -0.659                |
| 235        | 0.550 | -0.799                | 235        | 0.573 | -0.850                | 234        | 0.607 | -0.935                |
| 548        | 0.714 | -1.25                 | 547        | 0.732 | -1.32                 | 546        | 0.756 | -1.41                 |
| 841        | 0.791 | -1.57                 | 840        | 0.820 | -1.71                 | 839        | 0.842 | -1.84                 |
| 1121       | 0.853 | -1.91                 | 1120       | 0.864 | -2.00                 | 1119       | 0.893 | -2.24                 |
| 1405       | 0.890 | -2.21                 | 1406       | 0.896 | -2.26                 | 1406       | 0.917 | -2.48                 |
| 1740       | 0.917 | -2.48                 | 1740       | 0.934 | -2.72                 | 1739       | 0.945 | -2.90                 |
| 2041       | 0.940 | -2.82                 | 2041       | 0.946 | -2.92                 | 2040       | 0.960 | -3.23                 |
| 2190       | 0.948 | -2.97                 | 2190       | 0.952 | -3.03                 | 2189       | 0.969 | -3.47                 |
| 2543       | 0.960 | -3.22                 | 2543       | 0.971 | -3.53                 | 2542       | 0.974 | -3.64                 |

**Fig. S4** Kinetic plots of the Friedel-Crafts reaction between *N*-methylindole and *trans*- $\beta$ -nitrostyrene catalyzed by in-situ generated *N*-ferrocenium-*N'*-phenylthiourea  $\text{BAr}^{\text{F}}_4$  (**4a**).

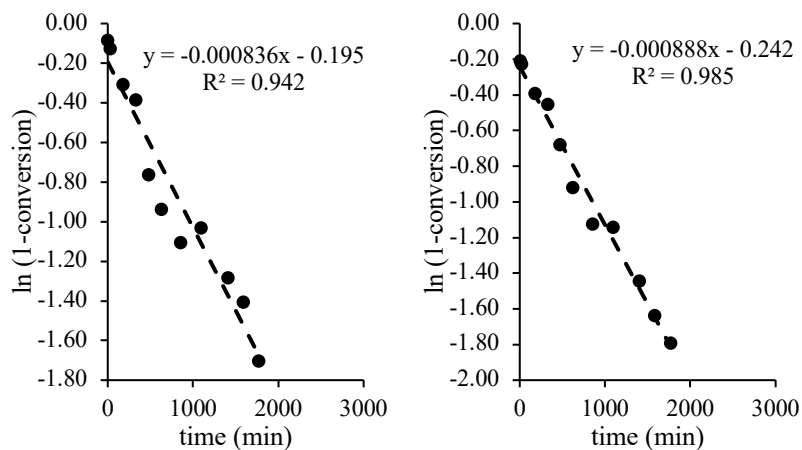

| Trial 1    |        |             | Trial 2    |       |             |
|------------|--------|-------------|------------|-------|-------------|
| time (min) | conv.  | ln(1-conv.) | time (min) | conv. | ln(1-conv.) |
| 0.00       | 0.0798 | -0.0831     | 0.00       | 0.187 | -0.207      |
| 24.9       | 0.118  | -0.125      | 15.9       | 0.202 | -0.226      |
| 179        | 0.263  | -0.305      | 171        | 0.323 | -0.390      |
| 329        | 0.320  | -0.385      | 321        | 0.363 | -0.451      |
| 477        | 0.533  | -0.761      | 469        | 0.492 | -0.676      |
| 625        | 0.608  | -0.936      | 617        | 0.601 | -0.919      |
| 856        | 0.669  | -1.11       | 848        | 0.675 | -1.12       |
| 1094       | 0.643  | -1.03       | 1085       | 0.680 | -1.14       |
| 1406       | 0.722  | -1.28       | 1399       | 0.763 | -1.44       |
| 1586       | 0.754  | -1.40       | 1578       | 0.806 | -1.64       |
| 1772       | 0.818  | -1.70       | 1764       | 0.833 | -1.79       |

**Fig. S5** Kinetic plots of the Friedel-Crafts reaction between *N*-methylindole and *trans*- $\beta$ -nitrostyrene catalyzed by in-situ generated *N*-ferroceniummethyl-*N'*-phenylthiourea  $\text{BAr}^{\text{F}}_4$  (**4b**).

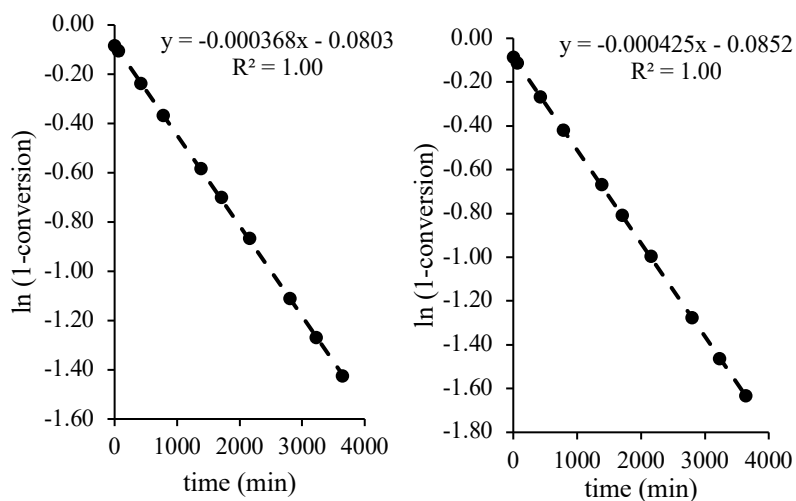

| Trial 1    |        |                       | Trial 2    |        |                       |
|------------|--------|-----------------------|------------|--------|-----------------------|
| time (min) | conv.  | $\ln(1-\text{conv.})$ | time (min) | conv.  | $\ln(1-\text{conv.})$ |
| 0.00       | 0.0798 | -0.0831               | 0.00       | 0.0826 | -0.0862               |
| 56.9       | 0.0991 | -0.104                | 57.6       | 0.104  | -0.110                |
| 418        | 0.211  | -0.236                | 418        | 0.233  | -0.265                |
| 778        | 0.307  | -0.367                | 777        | 0.342  | -0.419                |
| 1376       | 0.441  | -0.582                | 1376       | 0.487  | -0.668                |
| 1704       | 0.503  | -0.700                | 1704       | 0.554  | -0.806                |
| 2154       | 0.579  | -0.866                | 2154       | 0.630  | -0.994                |
| 2799       | 0.670  | -1.11                 | 2798       | 0.720  | -1.27                 |
| 3226       | 0.719  | -1.27                 | 3225       | 0.769  | -1.46                 |
| 3636       | 0.759  | -1.42                 | 3636       | 0.805  | -1.63                 |

**Fig. S6** Kinetic plots of the Friedel-Crafts reaction between *N*-methylindole and *trans*- $\beta$ -nitrostyrene catalyzed by Schreiner's Thiourea (**1**).

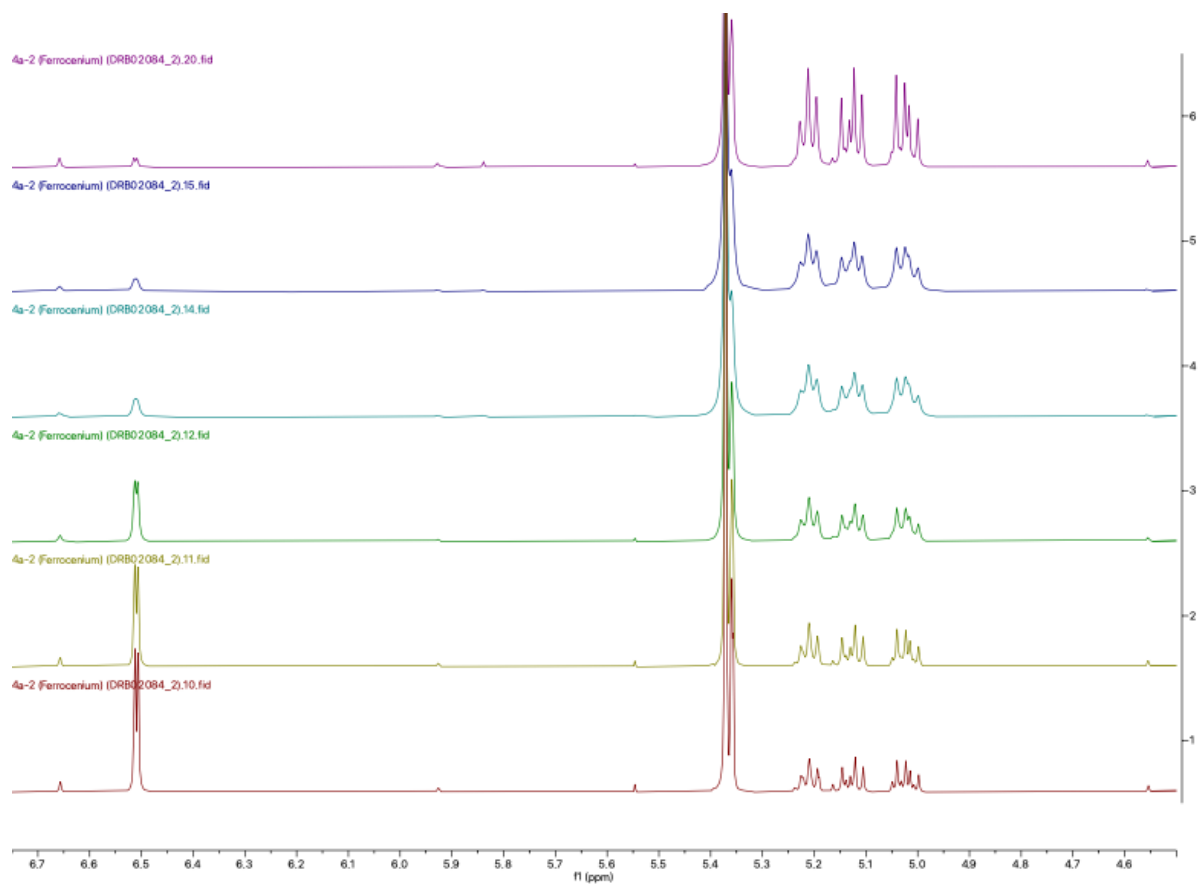

**Fig. S7** Stacked spectra for six time points ( $t = 0, 86.1, 235, 840, 1120,$  and  $1740$  min) of the kinetic data for the Friedel-Crafts reaction between *N*-methylindole and *trans*- $\beta$ -nitrostyrene catalyzed by in-situ generated *N*-ferrocenium-*N'*-phenylthiourea  $\text{BAr}^{\text{F}}_4$  (**4a**). The signals at 6.5 and 5.0 - 5.2  $\delta$  correspond to *N*-methylindole and the reaction product, respectively.

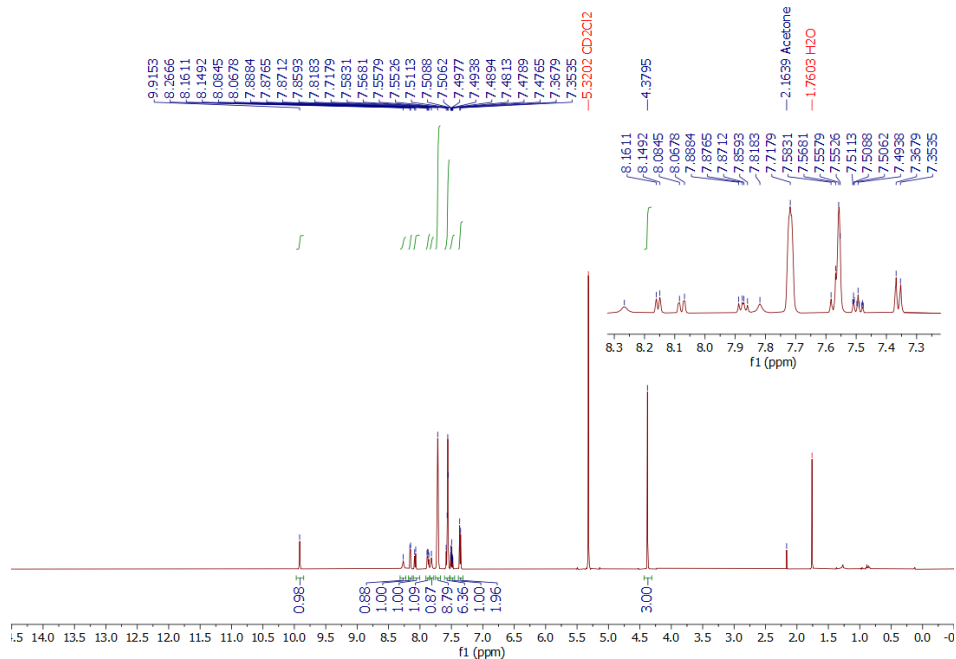

**Fig. S8** <sup>1</sup>H NMR spectrum of 1-methyl-3-(3-phenylthioureido)pyridinium tetrakis(3,5-bis(trifluoromethyl)phenyl)borate (**2**) in CD<sub>2</sub>Cl<sub>2</sub>.

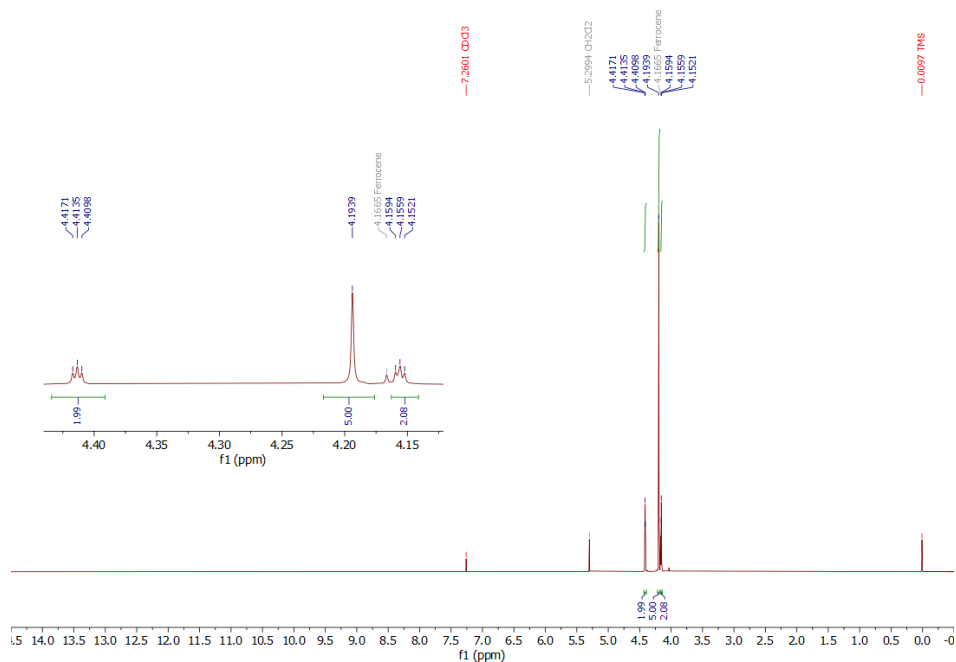

**Fig. S9** <sup>1</sup>H NMR spectrum of iodoferrocene (**7**) taken in CDCl<sub>3</sub>.



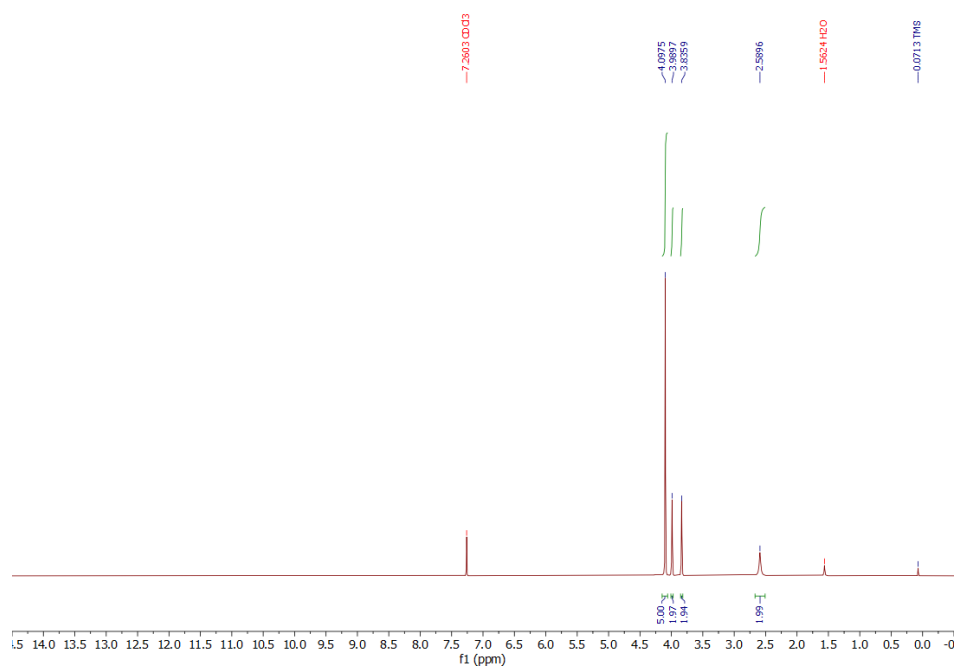

Fig. S10  $^1\text{H}$  NMR spectrum of aminoferrocene (**8a**) taken in  $\text{CD}_2\text{Cl}_2$ .

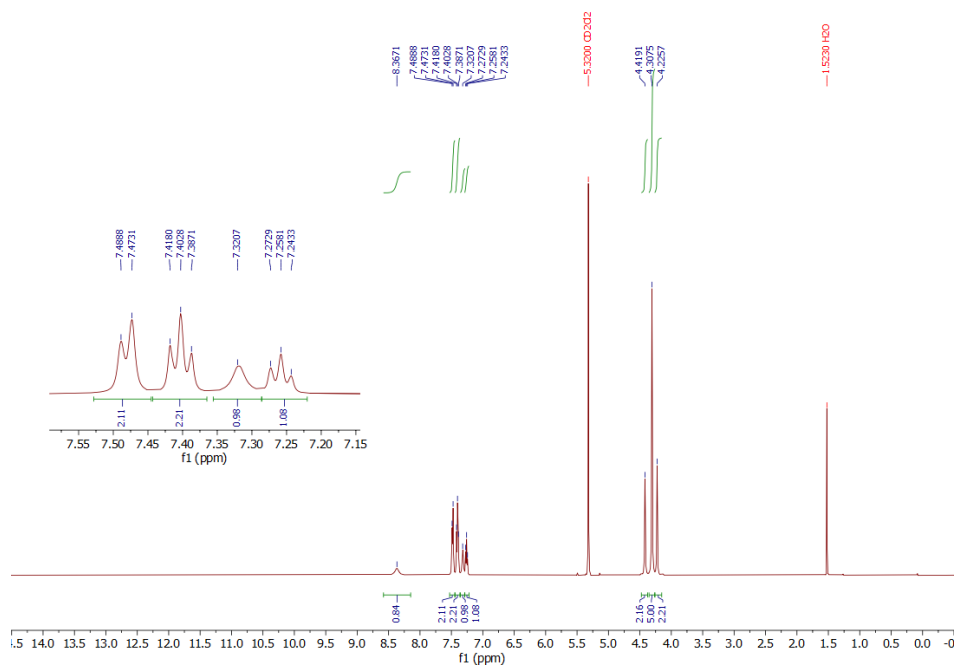

Fig. S11  $^1\text{H}$  NMR spectrum of *N*-ferrocenyl-*N'*-phenylthiourea (**9a**) taken in  $\text{CD}_2\text{Cl}_2$ .

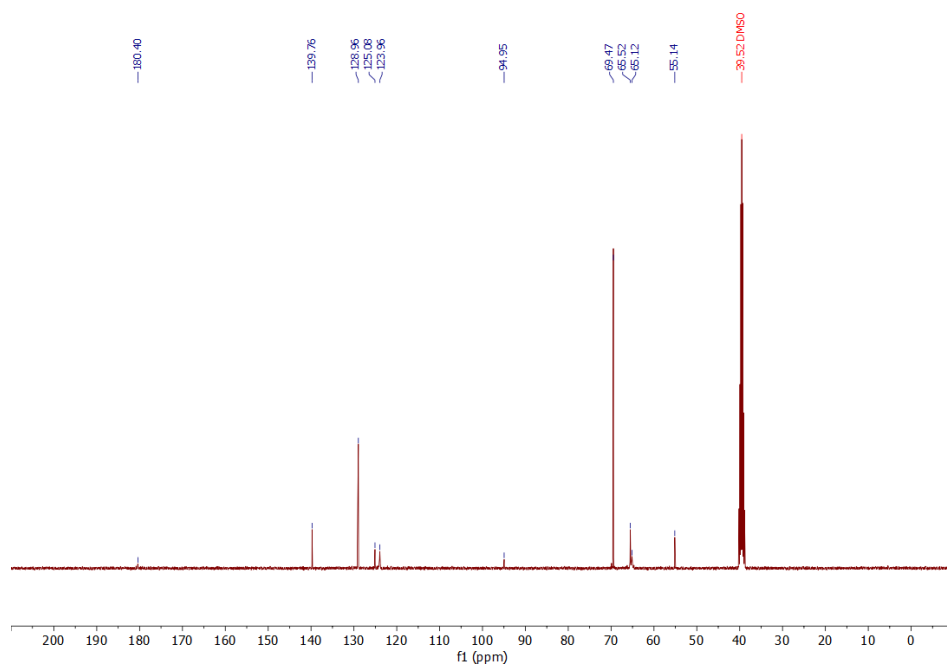

**Fig. S12**  $^{13}\text{C}$  NMR spectrum of *N*-ferrocenyl-*N*-phenylthiourea (**9a**) taken in  $\text{CD}_2\text{Cl}_2$ .

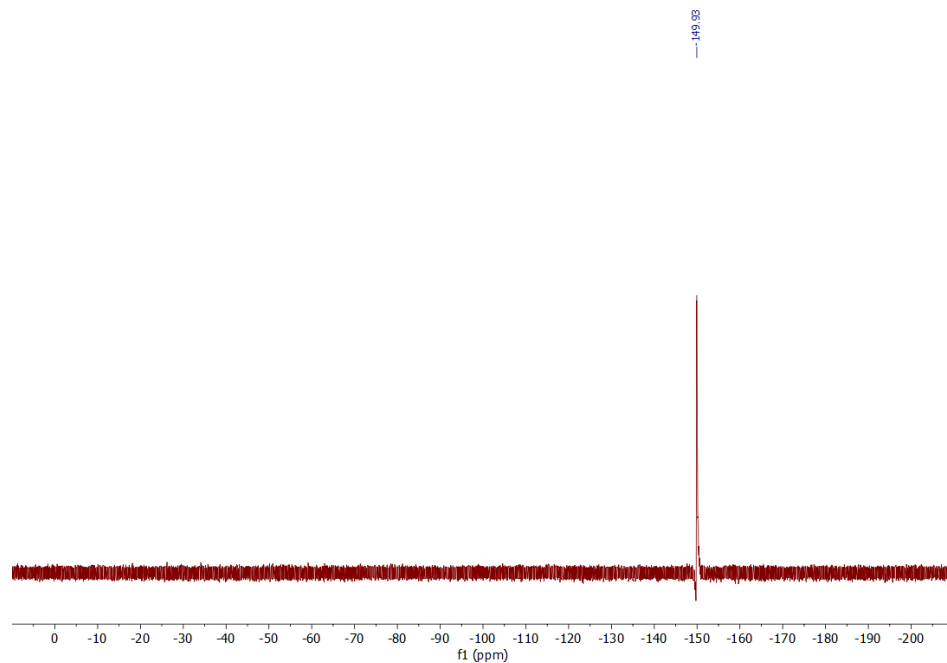

**Fig. S13**  $^{19}\text{F}$  NMR spectrum of *N*-ferrocenium-*N*-phenylthiourea tetrafluoroborate (**10**) in  $\text{CD}_2\text{Cl}_2$ .

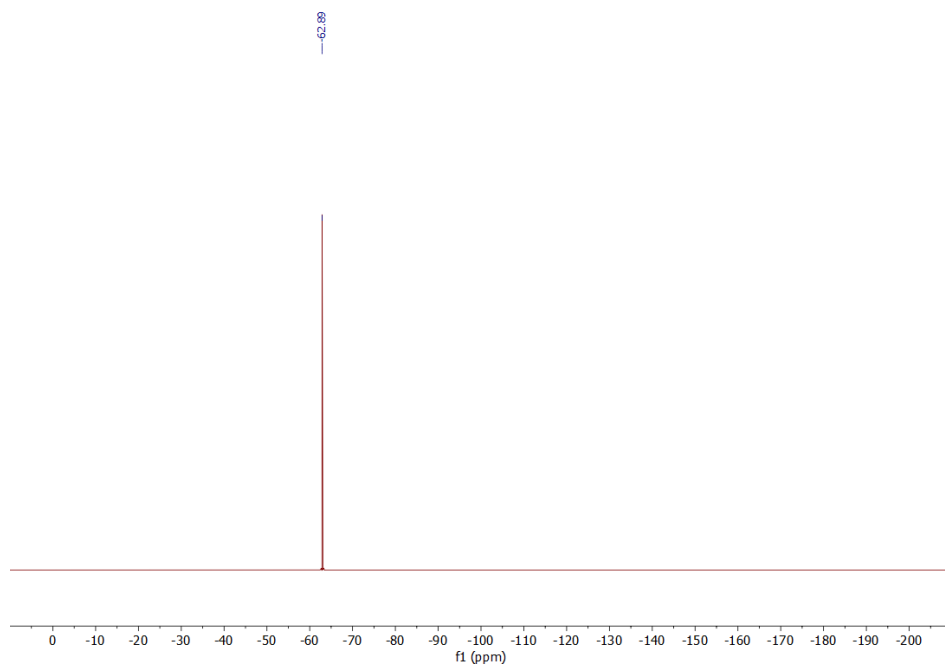

**Fig. S14**  $^{19}\text{F}$  NMR spectrum of *N*-ferrocenium-*N*-phenylthiourea tetrakis[3,5-bis(trifluoromethyl)phenyl]borate ( $\text{BAr}^{\text{F}}_4$ ) (**4a**) taken in  $\text{CD}_2\text{Cl}_2$ .

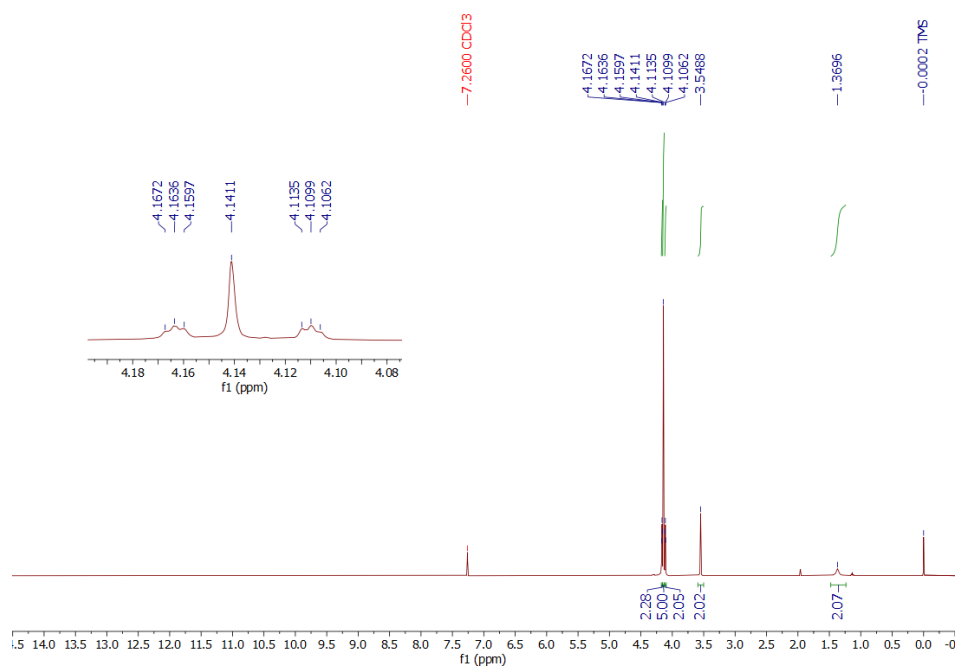

**Fig. S15**  $^1\text{H}$  NMR spectrum of aminomethylferrocene (**8b**) taken in  $\text{CDCl}_3$ .

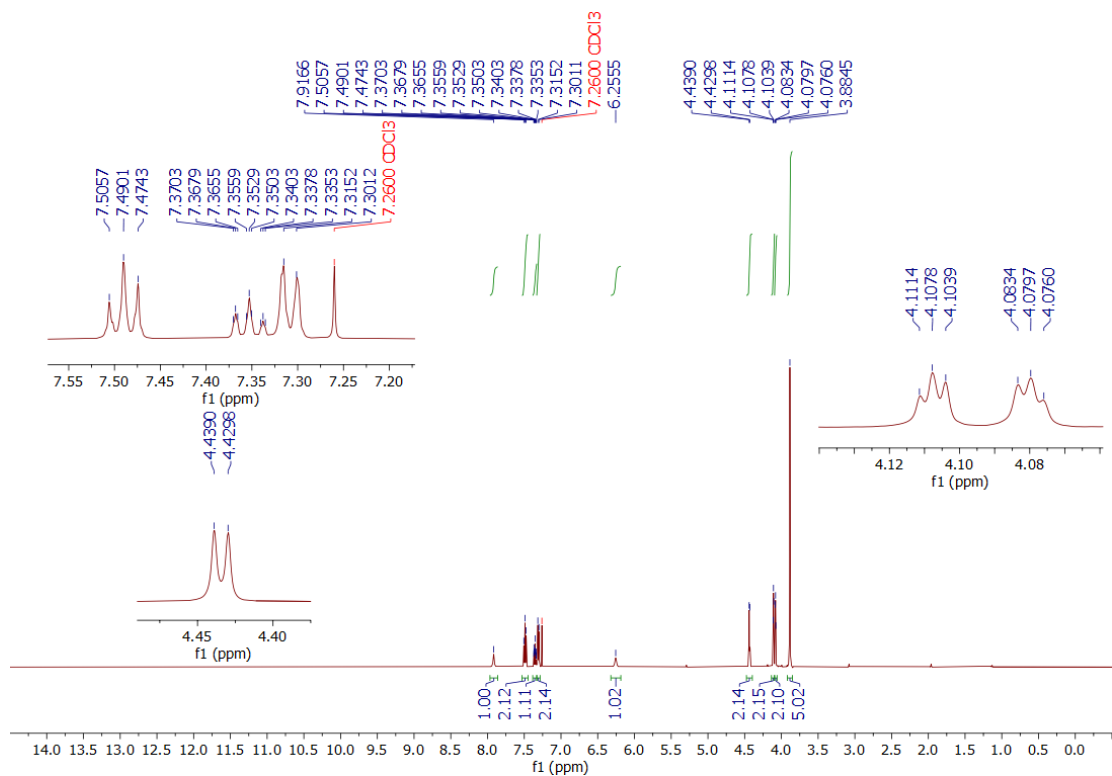

Fig. S16 <sup>1</sup>H NMR spectrum of *N*-methylferrocenyl-*N'*-phenylthiourea (**9b**) taken in CDCl<sub>3</sub>.

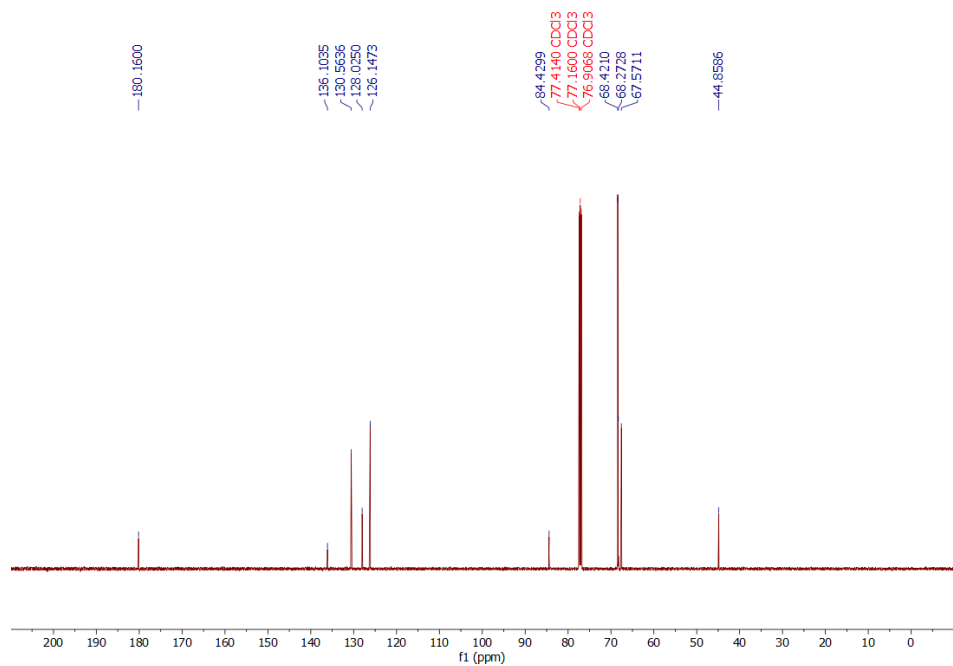

Fig. S17 <sup>13</sup>C NMR spectrum of *N*-methylferrocenyl-*N'*-phenylthiourea (**9b**) taken in CDCl<sub>3</sub>.

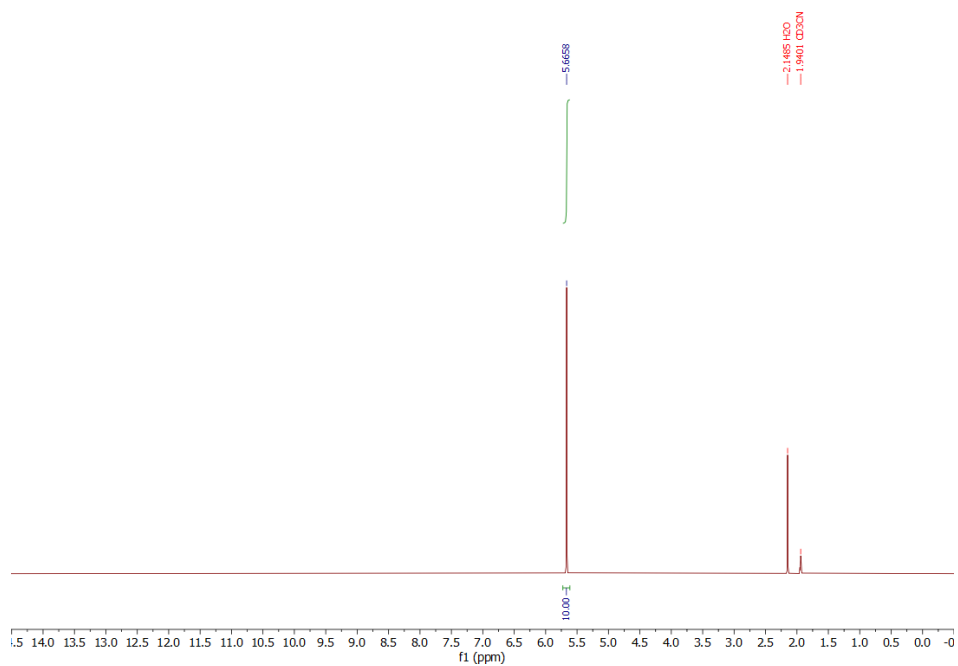

**Fig. S18**  $^1\text{H}$  NMR spectrum of cobaltocenium hexafluorophosphate (**11**) taken in  $\text{CD}_3\text{CN}$ .

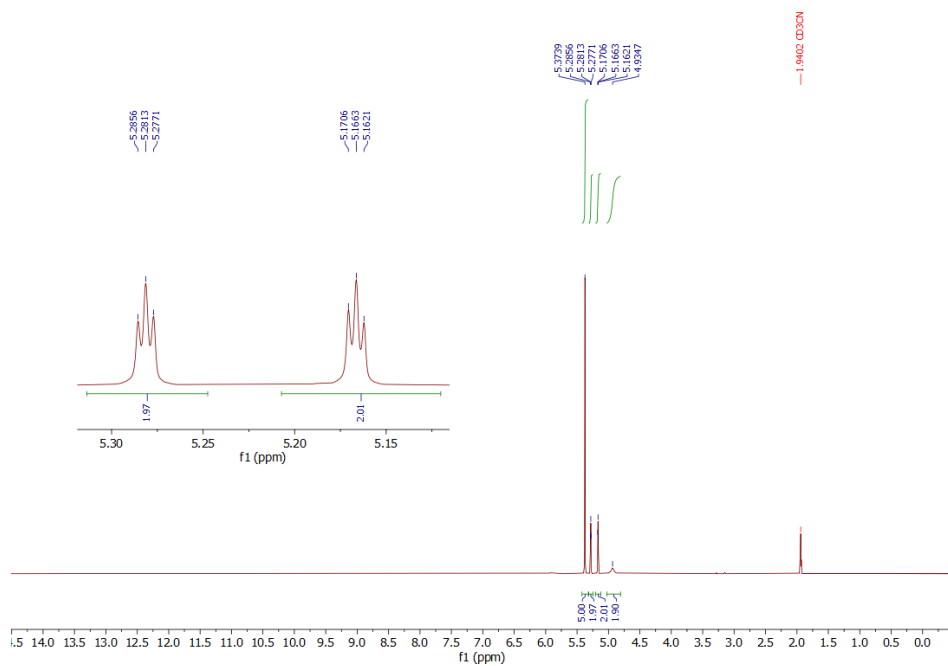

**Fig. S19**  $^1\text{H}$  NMR spectrum of aminocobaltocenium hexafluorophosphate (**12**) in  $\text{CD}_3\text{CN}$ .

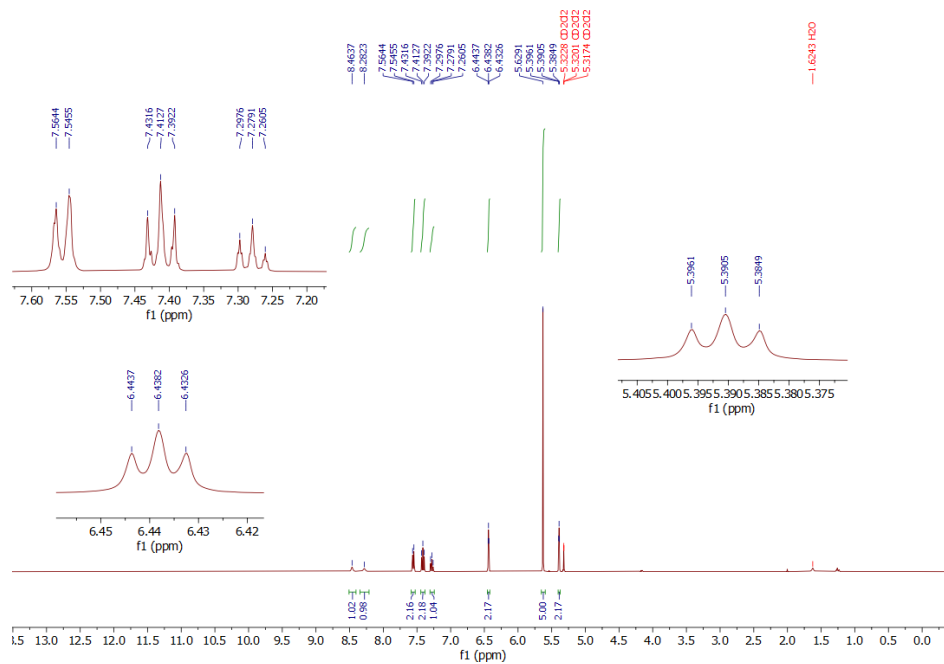

**Fig. S20**  $^1\text{H}$  NMR spectrum of *N*-cobaltocenium-*N'*-phenylthiourea hexafluorophosphate (**13**) in  $\text{CD}_2\text{Cl}_2$ .

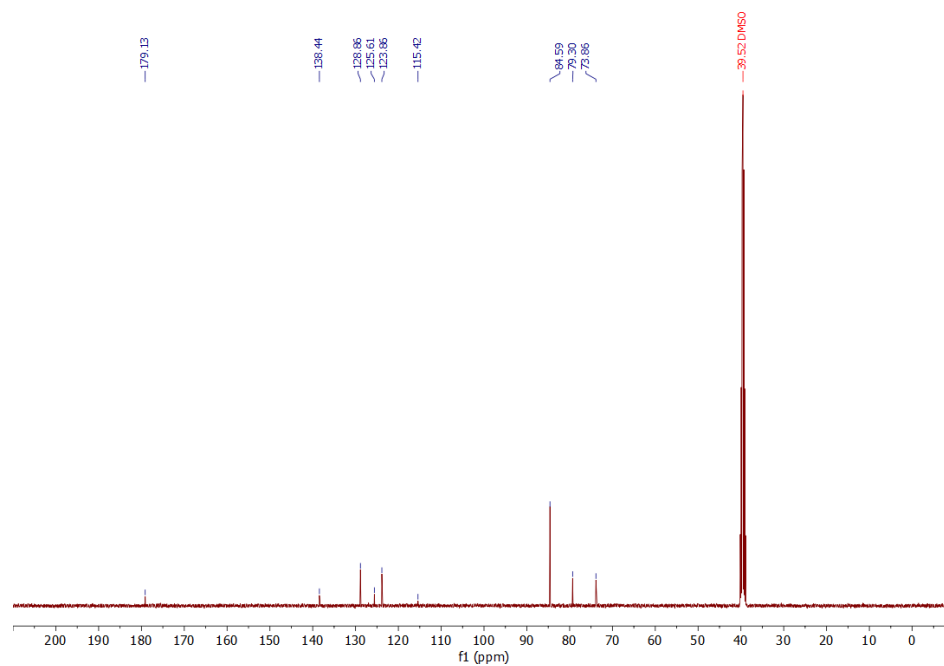

**Fig. S21**  $^{13}\text{C}$  NMR spectrum of *N*-cobaltocenium-*N'*-phenylthiourea hexafluorophosphate (**13**) in  $\text{DMSO-}d_6$ .

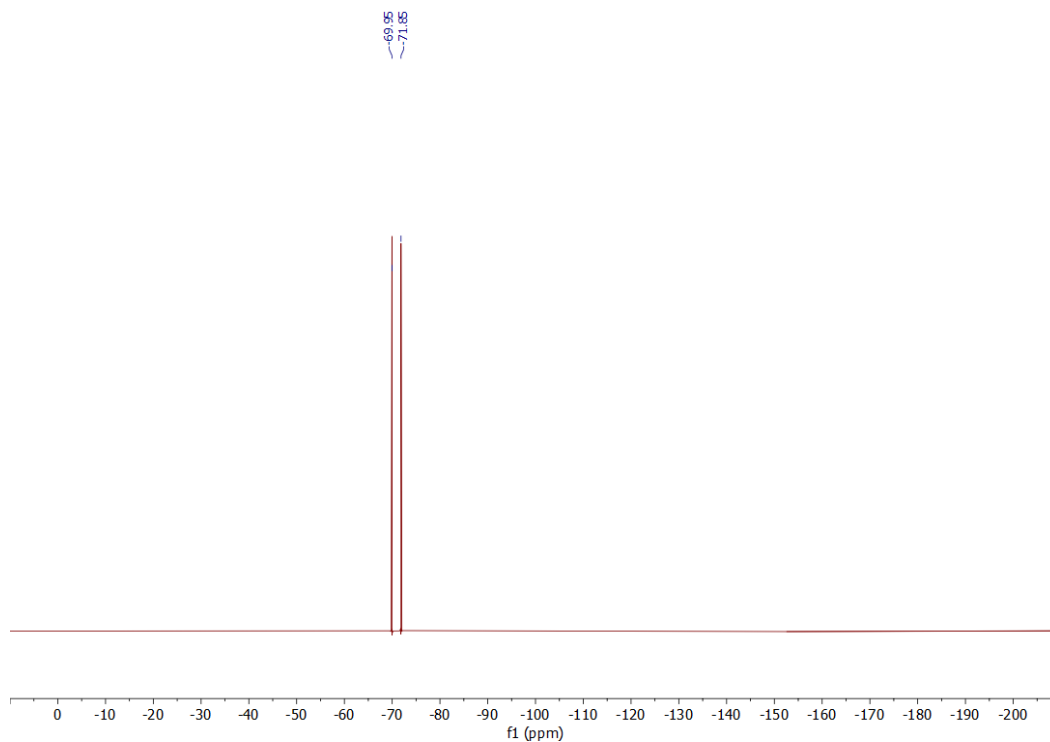

**Fig. S22** <sup>19</sup>F NMR spectrum of *N*-cobaltocenium-*N'*-phenylthiourea PF<sub>6</sub> (**13**) taken in CD<sub>2</sub>Cl<sub>2</sub>.

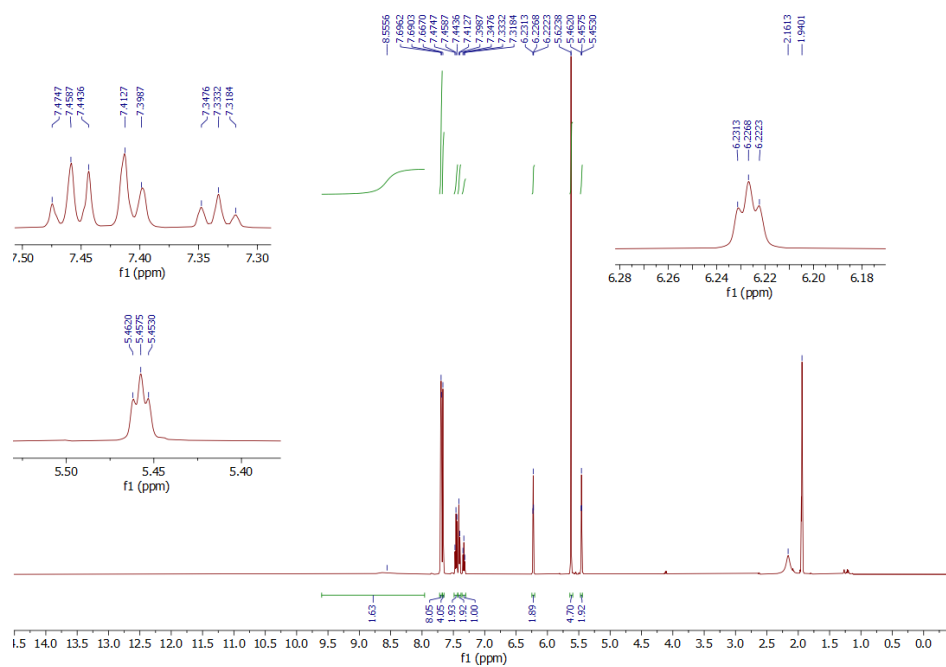

**Fig. S23** <sup>1</sup>H NMR spectrum of *N*-cobaltocenium-*N'*-phenylthiourea BARF<sub>4</sub> (**5**) taken in CD<sub>3</sub>CN.

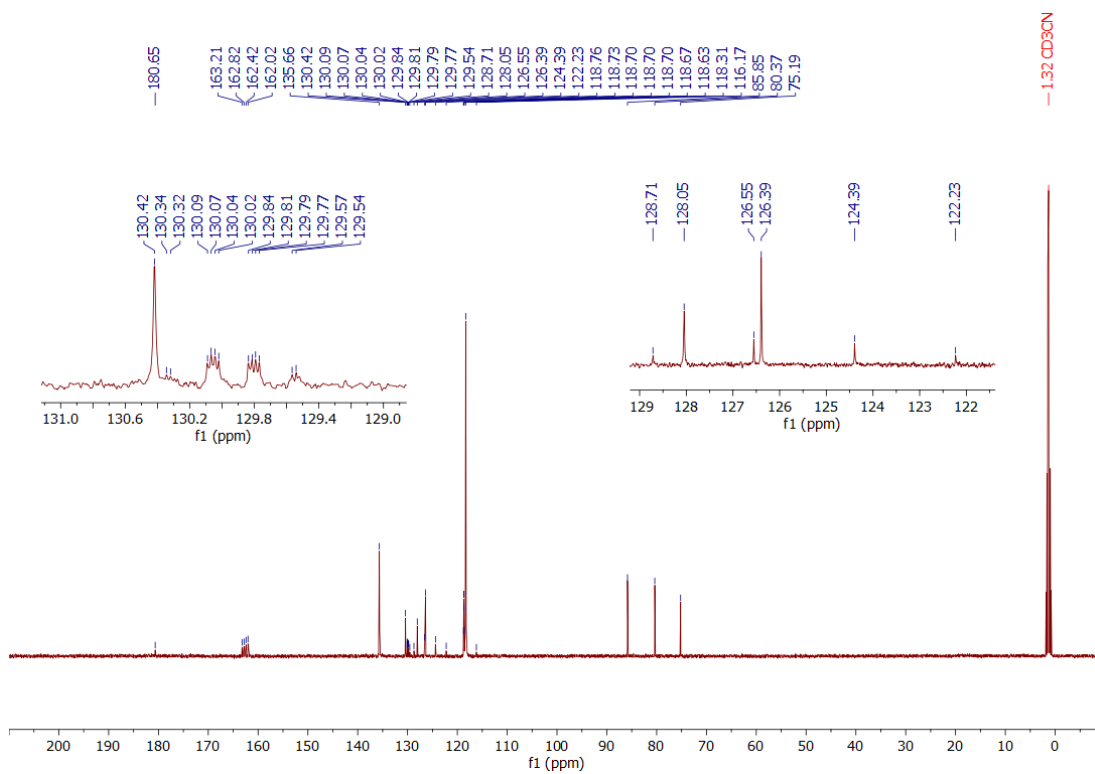

**Fig. S24**  $^{13}\text{C}$  NMR spectrum of *N*-cobaltocenium-*N'*-phenylthiourea BAr<sup>F</sup><sub>4</sub> (**5**) taken in CD<sub>3</sub>CN.

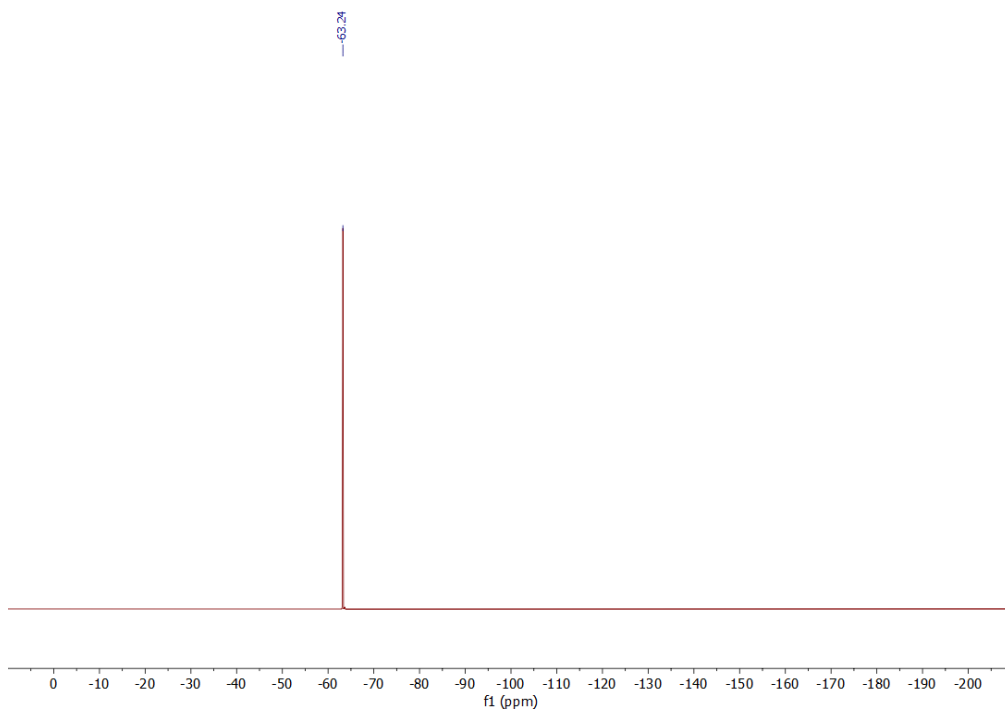

**Fig. S25**  $^{19}\text{F}$  NMR spectrum of *N*-cobaltocenium-*N'*-phenylthiourea BAr<sup>F</sup><sub>4</sub> (**5**) taken in CD<sub>3</sub>CN.



### **X-ray Crystallography of *N*-cobaltocenium-*N'*-phenylthiourea hexafluorophosphate (13).**

Diethyl ether vapor was allowed to diffuse into a saturated solution (2 mL) of *N*-cobaltocenium-*N'*-phenylthiourea hexafluorophosphate in 1,2-dichloroethane at room temperature over three days. A resulting crystal (approximately 0.150 x 0.150 x 0.120 mm) was placed onto the tip of a 0.5 mm MiTeGen loop and mounted on a Bruker PHOTON-III diffractometer for data collection at 125(2) K.<sup>S4</sup> A preliminary set of cell constants was calculated from reflections harvested from three sets of 12 frames. These initial sets of frames were oriented such that orthogonal wedges of reciprocal space were surveyed. This produced initial orientation matrices determined from 9989 reflections. The data collection was carried out using MoK $\alpha$  radiation (graphite monochromator) with a frame time of 10 seconds and a detector distance of 6.0 cm. A randomly oriented region of reciprocal space was surveyed to the extent of one sphere and to a resolution of 0.84 Å. Four major sections of frames were collected with 0.30° steps in  $\omega$  at four different  $\phi$  settings and a detector position of -28° in  $2\theta$ . The intensity data were corrected for absorption and decay.<sup>S5</sup> Final cell constants were calculated from the xyz centroids of 9948 strong reflections from the actual data collection after integration.<sup>S6</sup> For additional crystal and refinement information, see Table S1.

The structure (Fig. S26) was solved using SHELXT 2014/5 (Sheldrick, 2014)<sup>S7,S8</sup> and refined using SHELXL-2018/3 (Sheldrick, 2018).<sup>S9</sup> Its space group P2<sub>1</sub>2<sub>1</sub>2<sub>1</sub> was determined based on systematic absences and intensity statistics. A direct-methods solution was calculated which provided most non-hydrogen atoms from the E-map. Full-matrix least squares / difference Fourier cycles were performed which located the remaining non-hydrogen atoms. All non-hydrogen atoms were refined with anisotropic displacement parameters. All hydrogen atoms were placed in ideal positions and refined as riding atoms with relative isotropic displacement parameters. The final full matrix least squares refinement converged to  $R1 = 0.0443$  and  $wR2 = 0.1063$  ( $F^2$ , all data).

The structure is the one suggested and is a  $Z' = 2$ . There is substantial disorder in one of the  $\text{PF}_6^-$  anions and it was modelled to make an ideal octahedron using DFIX and EADP functions in conjunction with the more ordered  $\text{PF}_6^-$  ion. Additionally, to better model the F atoms of the disordered  $\text{PF}_6^-$ , the ISOR constraint was used.

**Table S1.** Crystal data and structure refinement for *N*-cobaltocenium-*N'*-phenylthiourea hexafluorophosphate.

|                                                     |                                                              |
|-----------------------------------------------------|--------------------------------------------------------------|
| Empirical formula                                   | $\text{C}_{17}\text{H}_{16}\text{CoF}_6\text{N}_2\text{PS}$  |
| Formula weight                                      | 484.28                                                       |
| Temperature (K)                                     | 125(2) K                                                     |
| Wavelength                                          | 0.71073 Å                                                    |
| Crystal system                                      | Orthorhombic                                                 |
| Space group                                         | $\text{P2}_1\text{2}_1\text{2}_1$                            |
| <i>a</i> (Å)                                        | 9.9480(4) Å                                                  |
| <i>b</i> (Å)                                        | 13.3446(5) Å                                                 |
| <i>c</i> (Å)                                        | 27.6271(9) Å                                                 |
| Volume (Å <sup>3</sup> )                            | 3667.6(2) Å <sup>3</sup>                                     |
| <i>Z</i>                                            | 8                                                            |
| Density (calculated)                                | 1.754 Mg/m <sup>3</sup>                                      |
| Absorption coefficient                              | 1.201 mm <sup>-1</sup>                                       |
| <i>F</i> (000)                                      | 1952                                                         |
| Crystal color, morphology                           | Orange, block                                                |
| Crystal size                                        | 0.150 x 0.150 x 0.120 mm <sup>3</sup>                        |
| Theta range for data collection                     | 2.122 to 30.513°                                             |
| Index ranges                                        | $-13 \leq h \leq 14, -16 \leq k \leq 19, -31 \leq l \leq 39$ |
| Reflections collected                               | 34402                                                        |
| Independent reflections                             | 11142 [ <i>R</i> (int) = 0.0416]                             |
| Observed reflections                                | 9617                                                         |
| Completeness to theta = 25.242°                     | 99.9%                                                        |
| Absorption correction                               | Semi-empirical from equivalents                              |
| Refinement method                                   | Full-matrix least-squares on <i>F</i> <sup>2</sup>           |
| Data / restraints / parameters                      | 11142 / 126 / 544                                            |
| Goodness-of-fit on <i>F</i> <sup>2</sup>            | 1.055                                                        |
| Final <i>R</i> indices [ <i>I</i> > 2σ( <i>I</i> )] | <i>R</i> 1 = 0.0443, <i>wR</i> 2 = 0.1004                    |
| <i>R</i> indices (all data)                         | <i>R</i> 1 = 0.0553, <i>wR</i> 2 = 0.1063                    |
| Absolute structure parameter                        | -0.002(6)                                                    |
| Extinction coefficient                              | n/a                                                          |
| Largest diff. peak and hole                         | 1.143 and -0.524 e.Å <sup>-3</sup>                           |

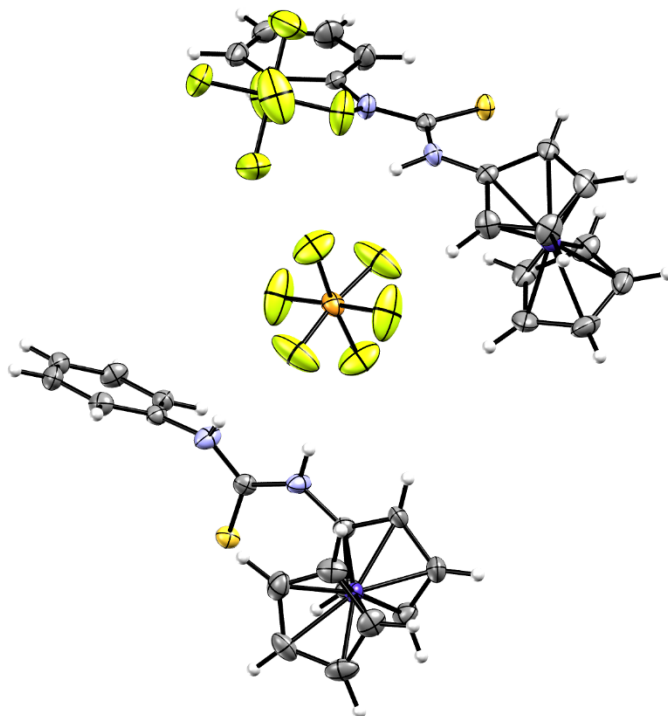

**Fig. S26** Structure of *N*-cobaltocenium-*N'*-phenylthiourea hexafluorophosphate as determined by single crystal X-ray diffraction.

Some equations of interest:

$$R_{\text{int}} = \frac{\sum |F_o^2 - \langle F_o^2 \rangle|}{\sum F_o^2}$$

$$R_1 = \frac{\sum ||F_o| - |F_c||}{\sum |F_o|}$$

$$wR2 = \left[ \frac{\sum [w(F_o^2 - F_c^2)^2]}{\sum [w(F_o^2)^2]} \right]^{1/2}$$

where  $w = \frac{1}{[s^2 (F_o^2) + (a^*P)^2 + b^*P + d + e^*\sin(q)]}$

$$\text{GooF} = S = \left[ \frac{\sum [w(F_o^2 - F_c^2)^2]}{(n-p)} \right]^{1/2}$$

**Table S2.** Atomic coordinates ( $\times 10^4$ ) and equivalent isotropic displacement parameters ( $\text{\AA}^2 \times 10^3$ ) for *N*-cobaltocenium-*N'*-phenylthiourea  $\text{PF}_6^-$ .  $U_{\text{eq}}$  is defined as one third of the trace of the orthogonalized  $U_{ij}$  tensor.

|     | x        | y        | z       | $U_{\text{eq}}$ |
|-----|----------|----------|---------|-----------------|
| Co1 | -339(1)  | 4723(1)  | 4693(1) | 20(1)           |
| C1  | 5375(4)  | 6745(3)  | 4286(1) | 22(1)           |
| N1  | 4311(4)  | 6038(3)  | 4340(2) | 29(1)           |
| S1  | 2320(1)  | 7279(1)  | 4105(1) | 24(1)           |
| Co2 | 3560(1)  | 293(1)   | 2834(1) | 21(1)           |
| C2  | 5588(4)  | 7221(3)  | 3847(2) | 26(1)           |
| N2  | 2354(4)  | 5269(3)  | 4183(1) | 27(1)           |
| S2  | 6838(1)  | 1040(1)  | 2132(1) | 25(1)           |
| P1A | 5136(8)  | 3332(6)  | 3710(3) | 27(1)           |
| F1A | 5400(9)  | 2969(5)  | 3163(2) | 76(2)           |
| F2A | 5965(8)  | 4316(5)  | 3640(3) | 81(2)           |
| F3A | 6365(6)  | 2683(5)  | 3886(2) | 60(1)           |
| F4A | 3867(6)  | 3901(5)  | 3492(2) | 60(1)           |
| F5A | 4280(8)  | 2357(5)  | 3789(3) | 81(2)           |
| F6A | 4688(10) | 3663(5)  | 4236(2) | 76(2)           |
| P1B | 5254(17) | 3430(12) | 3726(6) | 27(1)           |
| F1B | 4621(13) | 3015(10) | 3258(3) | 71(3)           |
| F2B | 4740(16) | 4493(8)  | 3563(4) | 80(3)           |
| F3B | 6578(9)  | 3579(10) | 3427(4) | 64(3)           |
| F4B | 3901(10) | 3298(10) | 4030(4) | 64(3)           |
| F5B | 5642(16) | 2329(8)  | 3859(4) | 80(3)           |
| F6B | 5883(13) | 3829(10) | 4197(3) | 71(3)           |
| P2  | 9559(1)  | 955(1)   | 4274(1) | 28(1)           |
| F7  | 8505(4)  | 1637(3)  | 4541(2) | 65(1)           |
| C7  | 3018(4)  | 6166(3)  | 4211(1) | 22(1)           |
| C6  | 6235(5)  | 6915(3)  | 4670(2) | 28(1)           |
| C5  | 7324(5)  | 7555(4)  | 4610(2) | 31(1)           |
| N4  | 6563(4)  | 866(3)   | 3089(1) | 22(1)           |
| C4  | 7544(5)  | 8018(3)  | 4174(2) | 28(1)           |
| F8  | 9431(6)  | 146(3)   | 4688(1) | 82(2)           |

|     |          |          |         |       |
|-----|----------|----------|---------|-------|
| C8  | 990(4)   | 5082(3)  | 4136(2) | 25(1) |
| F9  | 8376(4)  | 419(3)   | 3980(1) | 61(1) |
| C9  | -133(4)  | 5734(3)  | 4142(2) | 27(1) |
| F10 | 10619(4) | 268(4)   | 4007(2) | 83(1) |
| C10 | -1310(5) | 5143(4)  | 4084(2) | 30(1) |
| F11 | 9649(5)  | 1763(3)  | 3844(1) | 72(1) |
| C11 | -915(5)  | 4114(4)  | 4059(2) | 33(1) |
| F12 | 10714(3) | 1523(3)  | 4554(1) | 59(1) |
| C12 | 494(5)   | 4077(3)  | 4100(2) | 27(1) |
| N3  | 8293(4)  | 1846(3)  | 2858(1) | 26(1) |
| C3  | 6672(5)  | 7860(4)  | 3791(2) | 30(1) |
| C19 | 9990(5)  | 3092(3)  | 2894(2) | 30(1) |
| C20 | 10885(5) | 3761(4)  | 2695(2) | 35(1) |
| C21 | 10975(5) | 3854(4)  | 2195(2) | 37(1) |
| C22 | 10153(6) | 3274(4)  | 1911(2) | 42(1) |
| C23 | 9265(5)  | 2587(4)  | 2103(2) | 35(1) |
| C24 | 7264(4)  | 1274(3)  | 2702(1) | 20(1) |
| C25 | 5525(4)  | 173(3)   | 3079(1) | 22(1) |
| C26 | 5217(4)  | -587(3)  | 2732(2) | 25(1) |
| C27 | 4115(5)  | -1154(3) | 2918(2) | 32(1) |
| C28 | 3724(5)  | -733(4)  | 3368(2) | 36(1) |
| C29 | 4583(5)  | 96(3)    | 3467(2) | 30(1) |
| C30 | 3348(5)  | 1660(3)  | 2514(2) | 33(1) |
| C31 | 3063(5)  | 886(4)   | 2182(2) | 35(1) |
| C32 | 1975(5)  | 326(4)   | 2366(2) | 37(1) |
| C33 | 1603(5)  | 727(4)   | 2821(2) | 40(1) |
| C34 | 2460(5)  | 1557(4)  | 2911(2) | 39(1) |
| C13 | 685(5)   | 4875(4)  | 5323(2) | 34(1) |
| C14 | -469(6)  | 5493(4)  | 5329(2) | 35(1) |
| C15 | -1609(5) | 4867(4)  | 5271(2) | 37(1) |
| C16 | -1151(5) | 3866(4)  | 5228(2) | 35(1) |
| C18 | 9175(4)  | 2500(3)  | 2606(2) | 24(1) |
| C17 | 271(5)   | 3872(4)  | 5258(2) | 33(1) |

**Table S3.** Bond lengths [Å] and angles [°] for *N*-cobaltocenium-*N'*-phenylthiourea PF<sub>6</sub><sup>-</sup>.

|             |           |             |           |
|-------------|-----------|-------------|-----------|
| Co(1)-C(10) | 2.020(4)  | P(1A)-F(2A) | 1.563(9)  |
| Co(1)-C(11) | 2.015(5)  | P(1A)-F(3A) | 1.575(10) |
| Co(1)-C(17) | 2.024(4)  | P(1A)-F(1A) | 1.609(10) |
| Co(1)-C(13) | 2.027(4)  | P(1B)-F(3B) | 1.567(17) |
| Co(1)-C(12) | 2.028(4)  | P(1B)-F(5B) | 1.563(17) |
| Co(1)-C(16) | 2.035(5)  | P(1B)-F(6B) | 1.540(17) |
| Co(1)-C(14) | 2.038(4)  | P(1B)-F(1B) | 1.541(17) |
| Co(1)-C(9)  | 2.045(4)  | P(1B)-F(2B) | 1.574(17) |
| Co(1)-C(15) | 2.046(5)  | P(1B)-F(4B) | 1.597(17) |
| Co(1)-C(8)  | 2.085(4)  | P(2)-F(7)   | 1.572(4)  |
| C(1)-C(6)   | 1.382(6)  | P(2)-F(8)   | 1.576(4)  |
| C(1)-C(2)   | 1.385(6)  | P(2)-F(10)  | 1.581(4)  |
| C(1)-N(1)   | 1.426(5)  | P(2)-F(12)  | 1.579(3)  |
| N(1)-C(7)   | 1.346(5)  | P(2)-F(9)   | 1.599(4)  |
| N(1)-H(1)   | 0.87(6)   | P(2)-F(11)  | 1.608(3)  |
| S(1)-C(7)   | 1.664(4)  | C(6)-C(5)   | 1.390(6)  |
| Co(2)-C(34) | 2.022(5)  | C(6)-H(6)   | 0.9500    |
| Co(2)-C(28) | 2.020(5)  | C(5)-C(4)   | 1.371(7)  |
| Co(2)-C(27) | 2.021(4)  | C(5)-H(5)   | 0.9500    |
| Co(2)-C(31) | 2.029(5)  | N(4)-C(25)  | 1.387(5)  |
| Co(2)-C(33) | 2.032(5)  | N(4)-C(24)  | 1.388(5)  |
| Co(2)-C(30) | 2.038(4)  | N(4)-H(4A)  | 0.91(6)   |
| Co(2)-C(29) | 2.039(4)  | C(4)-C(3)   | 1.386(6)  |
| Co(2)-C(26) | 2.043(4)  | C(4)-H(4)   | 0.9500    |
| Co(2)-C(32) | 2.039(5)  | C(8)-C(9)   | 1.417(6)  |
| Co(2)-C(25) | 2.075(4)  | C(8)-C(12)  | 1.432(6)  |
| C(2)-C(3)   | 1.383(6)  | C(9)-C(10)  | 1.421(6)  |
| C(2)-H(2)   | 0.9500    | C(9)-H(9)   | 1.0000    |
| N(2)-C(7)   | 1.369(6)  | C(10)-C(11) | 1.430(7)  |
| N(2)-C(8)   | 1.385(5)  | C(10)-H(10) | 1.0000    |
| N(2)-H(2AA) | 0.88(6)   | C(11)-C(12) | 1.408(7)  |
| S(2)-C(24)  | 1.659(4)  | C(11)-H(11) | 1.0000    |
| P(1A)-F(6A) | 1.583(9)  | C(12)-H(12) | 1.0000    |
| P(1A)-F(5A) | 1.570(9)  | N(3)-C(24)  | 1.348(5)  |
| P(1A)-F(4A) | 1.592(10) | N(3)-C(18)  | 1.420(6)  |

|             |          |                   |            |
|-------------|----------|-------------------|------------|
| N(3)-H(3A)  | 0.93(4)  | C(14)-H(14)       | 1.0000     |
| C(3)-H(3)   | 0.9500   | C(15)-C(16)       | 1.417(7)   |
| C(19)-C(20) | 1.375(7) | C(15)-H(15)       | 1.0000     |
| C(19)-C(18) | 1.383(6) | C(16)-C(17)       | 1.417(7)   |
| C(19)-H(19) | 0.9500   | C(16)-H(16)       | 1.0000     |
| C(20)-C(21) | 1.390(8) | C(17)-H(17)       | 1.0000     |
| C(20)-H(20) | 0.9500   | C(10)-Co(1)-C(11) | 41.5(2)    |
| C(21)-C(22) | 1.372(8) | C(10)-Co(1)-C(17) | 160.4(2)   |
| C(21)-H(21) | 0.9500   | C(11)-Co(1)-C(17) | 122.0(2)   |
| C(22)-C(23) | 1.380(7) | C(10)-Co(1)-C(13) | 158.1(2)   |
| C(22)-H(22) | 0.9500   | C(11)-Co(1)-C(13) | 158.4(2)   |
| C(23)-C(18) | 1.398(6) | C(17)-Co(1)-C(13) | 40.8(2)    |
| C(23)-H(23) | 0.9500   | C(10)-Co(1)-C(12) | 68.9(2)    |
| C(25)-C(26) | 1.428(6) | C(11)-Co(1)-C(12) | 40.76(19)  |
| C(25)-C(29) | 1.427(6) | C(17)-Co(1)-C(12) | 105.18(19) |
| C(26)-C(27) | 1.427(6) | C(13)-Co(1)-C(12) | 122.0(2)   |
| C(26)-H(26) | 1.0000   | C(10)-Co(1)-C(16) | 124.8(2)   |
| C(27)-C(28) | 1.420(7) | C(11)-Co(1)-C(16) | 107.0(2)   |
| C(27)-H(27) | 1.0000   | C(17)-Co(1)-C(16) | 40.9(2)    |
| C(28)-C(29) | 1.424(7) | C(13)-Co(1)-C(16) | 68.4(2)    |
| C(28)-H(28) | 1.0000   | C(12)-Co(1)-C(16) | 120.6(2)   |
| C(29)-H(29) | 1.0000   | C(10)-Co(1)-C(14) | 123.2(2)   |
| C(30)-C(34) | 1.414(8) | C(11)-Co(1)-C(14) | 159.1(2)   |
| C(30)-C(31) | 1.411(7) | C(17)-Co(1)-C(14) | 68.7(2)    |
| C(30)-H(30) | 1.0000   | C(13)-Co(1)-C(14) | 40.7(2)    |
| C(31)-C(32) | 1.409(7) | C(12)-Co(1)-C(14) | 159.3(2)   |
| C(31)-H(31) | 1.0000   | C(16)-Co(1)-C(14) | 68.5(2)    |
| C(32)-C(33) | 1.415(8) | C(10)-Co(1)-C(9)  | 40.92(18)  |
| C(32)-H(32) | 1.0000   | C(11)-Co(1)-C(9)  | 69.3(2)    |
| C(33)-C(34) | 1.420(7) | C(17)-Co(1)-C(9)  | 156.2(2)   |
| C(33)-H(33) | 1.0000   | C(13)-Co(1)-C(9)  | 121.53(19) |
| C(34)-H(34) | 1.0000   | C(12)-Co(1)-C(9)  | 68.79(18)  |
| C(13)-C(17) | 1.412(7) | C(16)-Co(1)-C(9)  | 161.99(19) |
| C(13)-C(14) | 1.414(7) | C(14)-Co(1)-C(9)  | 108.36(18) |
| C(13)-H(13) | 1.0000   | C(10)-Co(1)-C(15) | 109.22(19) |
| C(14)-C(15) | 1.417(7) | C(11)-Co(1)-C(15) | 122.8(2)   |

|                   |            |                   |            |
|-------------------|------------|-------------------|------------|
| C(17)-Co(1)-C(15) | 68.6(2)    | C(34)-Co(2)-C(29) | 106.7(2)   |
| C(13)-Co(1)-C(15) | 68.3(2)    | C(28)-Co(2)-C(29) | 41.07(19)  |
| C(12)-Co(1)-C(15) | 157.4(2)   | C(27)-Co(2)-C(29) | 69.05(19)  |
| C(16)-Co(1)-C(15) | 40.6(2)    | C(31)-Co(2)-C(29) | 158.9(2)   |
| C(14)-Co(1)-C(15) | 40.6(2)    | C(33)-Co(2)-C(29) | 122.0(2)   |
| C(9)-Co(1)-C(15)  | 125.54(19) | C(30)-Co(2)-C(29) | 122.56(19) |
| C(10)-Co(1)-C(8)  | 67.97(18)  | C(34)-Co(2)-C(26) | 158.5(2)   |
| C(11)-Co(1)-C(8)  | 68.37(19)  | C(28)-Co(2)-C(26) | 69.3(2)    |
| C(17)-Co(1)-C(8)  | 120.53(19) | C(27)-Co(2)-C(26) | 41.11(18)  |
| C(13)-Co(1)-C(8)  | 106.95(19) | C(31)-Co(2)-C(26) | 107.39(19) |
| C(12)-Co(1)-C(8)  | 40.74(17)  | C(33)-Co(2)-C(26) | 159.1(2)   |
| C(16)-Co(1)-C(8)  | 156.43(19) | C(30)-Co(2)-C(26) | 122.56(19) |
| C(14)-Co(1)-C(8)  | 124.04(19) | C(29)-Co(2)-C(26) | 68.98(18)  |
| C(9)-Co(1)-C(8)   | 40.11(17)  | C(34)-Co(2)-C(32) | 68.3(2)    |
| C(15)-Co(1)-C(8)  | 161.2(2)   | C(28)-Co(2)-C(32) | 122.7(2)   |
| C(6)-C(1)-C(2)    | 120.2(4)   | C(27)-Co(2)-C(32) | 107.8(2)   |
| C(6)-C(1)-N(1)    | 119.2(4)   | C(31)-Co(2)-C(32) | 40.5(2)    |
| C(2)-C(1)-N(1)    | 120.6(4)   | C(33)-Co(2)-C(32) | 40.7(2)    |
| C(7)-N(1)-C(1)    | 126.7(4)   | C(30)-Co(2)-C(32) | 68.0(2)    |
| C(7)-N(1)-H(1)    | 112(4)     | C(29)-Co(2)-C(32) | 158.7(2)   |
| C(1)-N(1)-H(1)    | 122(4)     | C(26)-Co(2)-C(32) | 123.3(2)   |
| C(34)-Co(2)-C(28) | 122.1(2)   | C(34)-Co(2)-C(25) | 122.66(19) |
| C(34)-Co(2)-C(27) | 158.9(2)   | C(28)-Co(2)-C(25) | 68.50(19)  |
| C(28)-Co(2)-C(27) | 41.1(2)    | C(27)-Co(2)-C(25) | 68.39(18)  |
| C(34)-Co(2)-C(31) | 68.6(2)    | C(31)-Co(2)-C(25) | 123.33(18) |
| C(28)-Co(2)-C(31) | 158.9(2)   | C(33)-Co(2)-C(25) | 158.6(2)   |
| C(27)-Co(2)-C(31) | 122.8(2)   | C(30)-Co(2)-C(25) | 107.91(18) |
| C(34)-Co(2)-C(33) | 41.0(2)    | C(29)-Co(2)-C(25) | 40.58(17)  |
| C(28)-Co(2)-C(33) | 106.5(2)   | C(26)-Co(2)-C(25) | 40.57(16)  |
| C(27)-Co(2)-C(33) | 122.4(2)   | C(32)-Co(2)-C(25) | 159.52(19) |
| C(31)-Co(2)-C(33) | 68.8(2)    | C(3)-C(2)-C(1)    | 119.9(4)   |
| C(34)-Co(2)-C(30) | 40.8(2)    | C(3)-C(2)-H(2)    | 120.0      |
| C(28)-Co(2)-C(30) | 158.7(2)   | C(1)-C(2)-H(2)    | 120.0      |
| C(27)-Co(2)-C(30) | 158.9(2)   | C(7)-N(2)-C(8)    | 129.4(4)   |
| C(31)-Co(2)-C(30) | 40.6(2)    | C(7)-N(2)-H(2AA)  | 119(4)     |
| C(33)-Co(2)-C(30) | 68.8(2)    | C(8)-N(2)-H(2AA)  | 112(4)     |



|                   |           |                  |          |
|-------------------|-----------|------------------|----------|
| F(6A)-P(1A)-F(5A) | 87.2(6)   | F(7)-P(2)-F(9)   | 90.4(2)  |
| F(6A)-P(1A)-F(4A) | 89.5(6)   | F(8)-P(2)-F(9)   | 90.2(2)  |
| F(5A)-P(1A)-F(4A) | 91.0(5)   | F(10)-P(2)-F(9)  | 89.7(2)  |
| F(6A)-P(1A)-F(2A) | 91.5(6)   | F(12)-P(2)-F(9)  | 177.7(2) |
| F(5A)-P(1A)-F(2A) | 178.6(8)  | F(7)-P(2)-F(11)  | 89.7(2)  |
| F(4A)-P(1A)-F(2A) | 88.3(5)   | F(8)-P(2)-F(11)  | 178.2(2) |
| F(6A)-P(1A)-F(3A) | 95.1(6)   | F(10)-P(2)-F(11) | 90.3(3)  |
| F(5A)-P(1A)-F(3A) | 85.6(5)   | F(12)-P(2)-F(11) | 89.9(2)  |
| F(4A)-P(1A)-F(3A) | 174.1(7)  | F(9)-P(2)-F(11)  | 88.0(2)  |
| F(2A)-P(1A)-F(3A) | 95.2(6)   | N(1)-C(7)-N(2)   | 111.3(4) |
| F(6A)-P(1A)-F(1A) | 173.0(8)  | N(1)-C(7)-S(1)   | 124.0(3) |
| F(5A)-P(1A)-F(1A) | 88.2(6)   | N(2)-C(7)-S(1)   | 124.7(3) |
| F(4A)-P(1A)-F(1A) | 85.3(5)   | C(1)-C(6)-C(5)   | 119.5(4) |
| F(2A)-P(1A)-F(1A) | 92.9(6)   | C(1)-C(6)-H(6)   | 120.2    |
| F(3A)-P(1A)-F(1A) | 89.8(6)   | C(5)-C(6)-H(6)   | 120.2    |
| F(3B)-P(1B)-F(5B) | 92.0(11)  | C(4)-C(5)-C(6)   | 120.3(4) |
| F(3B)-P(1B)-F(6B) | 93.5(10)  | C(4)-C(5)-H(5)   | 119.8    |
| F(5B)-P(1B)-F(6B) | 91.4(11)  | C(6)-C(5)-H(5)   | 119.8    |
| F(3B)-P(1B)-F(1B) | 86.9(10)  | C(25)-N(4)-C(24) | 128.2(3) |
| F(5B)-P(1B)-F(1B) | 87.7(11)  | C(25)-N(4)-H(4A) | 120(4)   |
| F(6B)-P(1B)-F(1B) | 179.1(14) | C(24)-N(4)-H(4A) | 110(4)   |
| F(3B)-P(1B)-F(2B) | 90.5(10)  | C(5)-C(4)-C(3)   | 120.2(4) |
| F(5B)-P(1B)-F(2B) | 174.2(14) | C(5)-C(4)-H(4)   | 119.9    |
| F(6B)-P(1B)-F(2B) | 93.6(11)  | C(3)-C(4)-H(4)   | 119.9    |
| F(1B)-P(1B)-F(2B) | 87.2(11)  | N(2)-C(8)-C(9)   | 131.4(4) |
| F(3B)-P(1B)-F(4B) | 179.1(13) | N(2)-C(8)-C(12)  | 120.8(4) |
| F(5B)-P(1B)-F(4B) | 88.9(10)  | C(9)-C(8)-C(12)  | 107.7(4) |
| F(6B)-P(1B)-F(4B) | 86.3(10)  | N(2)-C(8)-Co(1)  | 126.4(3) |
| F(1B)-P(1B)-F(4B) | 93.3(11)  | C(9)-C(8)-Co(1)  | 68.4(2)  |
| F(2B)-P(1B)-F(4B) | 88.6(10)  | C(12)-C(8)-Co(1) | 67.5(2)  |
| F(7)-P(2)-F(8)    | 90.2(3)   | C(8)-C(9)-C(10)  | 107.9(4) |
| F(7)-P(2)-F(10)   | 180.0(3)  | C(8)-C(9)-Co(1)  | 71.4(2)  |
| F(8)-P(2)-F(10)   | 89.8(3)   | C(10)-C(9)-Co(1) | 68.6(2)  |
| F(7)-P(2)-F(12)   | 88.7(2)   | C(8)-C(9)-H(9)   | 126.0    |
| F(8)-P(2)-F(12)   | 91.9(2)   | C(10)-C(9)-H(9)  | 126.0    |
| F(10)-P(2)-F(12)  | 91.3(2)   | Co(1)-C(9)-H(9)  | 126.0    |

|                   |          |                   |          |
|-------------------|----------|-------------------|----------|
| C(9)-C(10)-C(11)  | 108.2(4) | C(22)-C(23)-C(18) | 118.6(4) |
| C(9)-C(10)-Co(1)  | 70.5(2)  | C(22)-C(23)-H(23) | 120.7    |
| C(11)-C(10)-Co(1) | 69.0(3)  | C(18)-C(23)-H(23) | 120.7    |
| C(9)-C(10)-H(10)  | 125.9    | N(3)-C(24)-N(4)   | 110.9(3) |
| C(11)-C(10)-H(10) | 125.9    | N(3)-C(24)-S(2)   | 127.1(3) |
| Co(1)-C(10)-H(10) | 125.9    | N(4)-C(24)-S(2)   | 121.9(3) |
| C(12)-C(11)-C(10) | 107.7(4) | N(4)-C(25)-C(26)  | 130.4(4) |
| C(12)-C(11)-Co(1) | 70.1(3)  | N(4)-C(25)-C(29)  | 121.4(4) |
| C(10)-C(11)-Co(1) | 69.4(3)  | C(26)-C(25)-C(29) | 108.1(4) |
| C(12)-C(11)-H(11) | 126.2    | N(4)-C(25)-Co(2)  | 131.1(3) |
| C(10)-C(11)-H(11) | 126.2    | C(26)-C(25)-Co(2) | 68.5(2)  |
| Co(1)-C(11)-H(11) | 126.2    | C(29)-C(25)-Co(2) | 68.4(2)  |
| C(11)-C(12)-C(8)  | 108.4(4) | C(27)-C(26)-C(25) | 107.5(4) |
| C(11)-C(12)-Co(1) | 69.1(3)  | C(27)-C(26)-Co(2) | 68.6(3)  |
| C(8)-C(12)-Co(1)  | 71.8(2)  | C(25)-C(26)-Co(2) | 70.9(2)  |
| C(11)-C(12)-H(12) | 125.8    | C(27)-C(26)-H(26) | 126.3    |
| C(8)-C(12)-H(12)  | 125.8    | C(25)-C(26)-H(26) | 126.3    |
| Co(1)-C(12)-H(12) | 125.8    | Co(2)-C(26)-H(26) | 126.3    |
| C(24)-N(3)-C(18)  | 131.4(4) | C(28)-C(27)-C(26) | 108.4(4) |
| C(24)-N(3)-H(3A)  | 109(3)   | C(28)-C(27)-Co(2) | 69.4(3)  |
| C(18)-N(3)-H(3A)  | 120(3)   | C(26)-C(27)-Co(2) | 70.3(2)  |
| C(2)-C(3)-C(4)    | 119.8(4) | C(28)-C(27)-H(27) | 125.8    |
| C(2)-C(3)-H(3)    | 120.1    | C(26)-C(27)-H(27) | 125.8    |
| C(4)-C(3)-H(3)    | 120.1    | Co(2)-C(27)-H(27) | 125.8    |
| C(20)-C(19)-C(18) | 121.4(5) | C(27)-C(28)-C(29) | 108.0(4) |
| C(20)-C(19)-H(19) | 119.3    | C(27)-C(28)-Co(2) | 69.5(3)  |
| C(18)-C(19)-H(19) | 119.3    | C(29)-C(28)-Co(2) | 70.2(2)  |
| C(19)-C(20)-C(21) | 119.8(5) | C(27)-C(28)-H(28) | 126.0    |
| C(19)-C(20)-H(20) | 120.1    | C(29)-C(28)-H(28) | 126.0    |
| C(21)-C(20)-H(20) | 120.1    | Co(2)-C(28)-H(28) | 126.0    |
| C(22)-C(21)-C(20) | 118.7(5) | C(28)-C(29)-C(25) | 107.9(4) |
| C(22)-C(21)-H(21) | 120.7    | C(28)-C(29)-Co(2) | 68.8(3)  |
| C(20)-C(21)-H(21) | 120.7    | C(25)-C(29)-Co(2) | 71.0(2)  |
| C(21)-C(22)-C(23) | 122.4(5) | C(28)-C(29)-H(29) | 126.0    |
| C(21)-C(22)-H(22) | 118.8    | C(25)-C(29)-H(29) | 126.0    |
| C(23)-C(22)-H(22) | 118.8    | Co(2)-C(29)-H(29) | 126.0    |

|                   |          |                   |          |
|-------------------|----------|-------------------|----------|
| C(34)-C(30)-C(31) | 107.9(4) | C(14)-C(13)-Co(1) | 70.1(3)  |
| C(34)-C(30)-Co(2) | 69.0(3)  | C(17)-C(13)-H(13) | 125.7    |
| C(31)-C(30)-Co(2) | 69.4(3)  | C(14)-C(13)-H(13) | 125.7    |
| C(34)-C(30)-H(30) | 126.0    | Co(1)-C(13)-H(13) | 125.7    |
| C(31)-C(30)-H(30) | 126.0    | C(13)-C(14)-C(15) | 107.7(4) |
| Co(2)-C(30)-H(30) | 126.0    | C(13)-C(14)-Co(1) | 69.2(2)  |
| C(32)-C(31)-C(30) | 107.9(5) | C(15)-C(14)-Co(1) | 70.0(3)  |
| C(32)-C(31)-Co(2) | 70.1(3)  | C(13)-C(14)-H(14) | 126.1    |
| C(30)-C(31)-Co(2) | 70.0(3)  | C(15)-C(14)-H(14) | 126.1    |
| C(32)-C(31)-H(31) | 126.0    | Co(1)-C(14)-H(14) | 126.1    |
| C(30)-C(31)-H(31) | 126.0    | C(16)-C(15)-C(14) | 107.9(4) |
| Co(2)-C(31)-H(31) | 126.0    | C(16)-C(15)-Co(1) | 69.3(3)  |
| C(31)-C(32)-C(33) | 108.7(5) | C(14)-C(15)-Co(1) | 69.4(3)  |
| C(31)-C(32)-Co(2) | 69.3(3)  | C(16)-C(15)-H(15) | 126.0    |
| C(33)-C(32)-Co(2) | 69.4(3)  | C(14)-C(15)-H(15) | 126.0    |
| C(31)-C(32)-H(32) | 125.6    | Co(1)-C(15)-H(15) | 126.0    |
| C(33)-C(32)-H(32) | 125.6    | C(17)-C(16)-C(15) | 108.1(5) |
| Co(2)-C(32)-H(32) | 125.6    | C(17)-C(16)-Co(1) | 69.1(3)  |
| C(32)-C(33)-C(34) | 107.0(5) | C(15)-C(16)-Co(1) | 70.1(3)  |
| C(32)-C(33)-Co(2) | 69.9(3)  | C(17)-C(16)-H(16) | 126.0    |
| C(34)-C(33)-Co(2) | 69.1(3)  | C(15)-C(16)-H(16) | 126.0    |
| C(32)-C(33)-H(33) | 126.5    | Co(1)-C(16)-H(16) | 126.0    |
| C(34)-C(33)-H(33) | 126.5    | C(19)-C(18)-C(23) | 119.1(4) |
| Co(2)-C(33)-H(33) | 126.5    | C(19)-C(18)-N(3)  | 115.5(4) |
| C(30)-C(34)-C(33) | 108.4(5) | C(23)-C(18)-N(3)  | 125.3(4) |
| C(30)-C(34)-Co(2) | 70.2(3)  | C(13)-C(17)-C(16) | 107.7(5) |
| C(33)-C(34)-Co(2) | 69.9(3)  | C(13)-C(17)-Co(1) | 69.7(3)  |
| C(30)-C(34)-H(34) | 125.8    | C(16)-C(17)-Co(1) | 70.0(3)  |
| C(33)-C(34)-H(34) | 125.8    | C(13)-C(17)-H(17) | 126.1    |
| Co(2)-C(34)-H(34) | 125.8    | C(16)-C(17)-H(17) | 126.1    |
| C(17)-C(13)-C(14) | 108.5(4) | Co(1)-C(17)-H(17) | 126.1    |
| C(17)-C(13)-Co(1) | 69.5(3)  |                   |          |

---

Symmetry transformations used to generate equivalent atoms.

**Table S4.** Anisotropic displacement parameters ( $\text{\AA}^2 \times 10^3$ ) for *N*-cobaltocenium-*N'*-phenyl-

thiourea PF<sub>6</sub><sup>-</sup>. The anisotropic displacement factor exponent takes the form:  $-2p^2[ h^2 a^*2U_{11} + \dots + 2 h k a^* b^* U_{12} ]$

|     | U <sub>11</sub> | U <sub>22</sub> | U <sub>33</sub> | U <sub>23</sub> | U <sub>13</sub> | U <sub>12</sub> |
|-----|-----------------|-----------------|-----------------|-----------------|-----------------|-----------------|
| Co1 | 18(1)           | 20(1)           | 23(1)           | -1(1)           | 1(1)            | -3(1)           |
| C1  | 21(2)           | 17(2)           | 28(2)           | 0(2)            | 2(2)            | 1(2)            |
| N1  | 23(2)           | 20(2)           | 43(2)           | 10(2)           | 0(2)            | 2(1)            |
| S1  | 28(1)           | 20(1)           | 26(1)           | 4(1)            | 2(1)            | 2(1)            |
| Co2 | 21(1)           | 16(1)           | 26(1)           | 2(1)            | 1(1)            | -2(1)           |
| C2  | 23(2)           | 29(2)           | 25(2)           | -2(2)           | 0(2)            | -2(2)           |
| N2  | 21(2)           | 18(2)           | 41(2)           | 1(2)            | 6(2)            | 2(2)            |
| S2  | 29(1)           | 27(1)           | 19(1)           | -1(1)           | -3(1)           | -6(1)           |
| P1A | 34(2)           | 18(2)           | 29(1)           | 1(1)            | -3(1)           | 2(1)            |
| F1A | 139(5)          | 56(3)           | 34(2)           | 0(2)            | 10(3)           | 41(3)           |
| F2A | 100(4)          | 52(3)           | 92(3)           | 38(2)           | -40(3)          | -48(3)          |
| F3A | 45(2)           | 70(3)           | 66(2)           | 33(2)           | -12(2)          | 12(2)           |
| F4A | 45(2)           | 70(3)           | 66(2)           | 33(2)           | -12(2)          | 12(2)           |
| F5A | 100(4)          | 52(3)           | 92(3)           | 38(2)           | -40(3)          | -48(3)          |
| F6A | 139(5)          | 56(3)           | 34(2)           | 0(2)            | 10(3)           | 41(3)           |
| P1B | 34(2)           | 18(2)           | 29(1)           | 1(1)            | -3(1)           | 2(1)            |
| F1B | 78(5)           | 102(6)          | 34(3)           | -9(4)           | -14(4)          | -38(5)          |
| F2B | 114(7)          | 57(5)           | 70(5)           | 16(4)           | 33(5)           | 39(5)           |
| F3B | 39(4)           | 99(6)           | 53(4)           | 22(4)           | 12(3)           | 1(4)            |
| F4B | 39(4)           | 99(6)           | 53(4)           | 22(4)           | 12(3)           | 1(4)            |
| F5B | 114(7)          | 57(5)           | 70(5)           | 16(4)           | 33(5)           | 39(5)           |
| F6B | 78(5)           | 102(6)          | 34(3)           | -9(4)           | -14(4)          | -38(5)          |
| P2  | 30(1)           | 24(1)           | 31(1)           | 4(1)            | -5(1)           | -2(1)           |
| F7  | 42(2)           | 77(3)           | 75(3)           | -22(2)          | 0(2)            | 15(2)           |
| C7  | 24(2)           | 20(2)           | 21(2)           | 4(2)            | 5(2)            | -1(2)           |
| C6  | 29(2)           | 31(2)           | 24(2)           | 2(2)            | 0(2)            | 3(2)            |
| C5  | 24(2)           | 35(2)           | 33(2)           | -8(2)           | -5(2)           | -1(2)           |
| N4  | 26(2)           | 23(2)           | 18(1)           | -2(1)           | -4(1)           | -1(1)           |
| C4  | 24(2)           | 24(2)           | 36(2)           | -6(2)           | 2(2)            | -1(2)           |
| F8  | 153(4)          | 45(2)           | 48(2)           | 22(2)           | -26(3)          | -16(3)          |
| C8  | 24(2)           | 26(2)           | 24(2)           | -1(2)           | 4(2)            | -3(2)           |

|     |        |       |       |        |        |        |
|-----|--------|-------|-------|--------|--------|--------|
| F9  | 69(2)  | 61(2) | 54(2) | 4(2)   | -25(2) | -27(2) |
| C9  | 25(2)  | 28(2) | 27(2) | 3(2)   | 3(2)   | 1(2)   |
| F10 | 74(3)  | 99(3) | 77(3) | -43(3) | -4(2)  | 33(3)  |
| C10 | 23(2)  | 41(3) | 27(2) | 1(2)   | -5(2)  | 2(2)   |
| F11 | 119(4) | 51(2) | 46(2) | 16(2)  | -12(2) | -29(2) |
| C11 | 29(2)  | 37(3) | 34(2) | -13(2) | -4(2)  | -5(2)  |
| F12 | 34(2)  | 72(2) | 71(2) | -19(2) | -15(2) | -5(2)  |
| C12 | 27(2)  | 27(2) | 28(2) | -12(2) | 3(2)   | -3(2)  |
| N3  | 26(2)  | 30(2) | 22(2) | -3(2)  | -4(2)  | -6(1)  |
| C3  | 28(2)  | 33(2) | 30(2) | 9(2)   | 6(2)   | -4(2)  |
| C19 | 27(2)  | 25(2) | 37(2) | -6(2)  | -5(2)  | 1(2)   |
| C20 | 24(2)  | 25(2) | 55(3) | -5(2)  | -3(2)  | -2(2)  |
| C21 | 22(2)  | 34(3) | 55(3) | 0(2)   | 7(2)   | -1(2)  |
| C22 | 35(3)  | 51(3) | 41(3) | 1(2)   | 13(2)  | -12(2) |
| C23 | 29(2)  | 46(3) | 31(2) | -9(2)  | 4(2)   | -12(2) |
| C24 | 19(2)  | 19(2) | 21(2) | -1(1)  | -2(1)  | 4(1)   |
| C25 | 21(2)  | 22(2) | 22(2) | 5(2)   | -3(1)  | 3(2)   |
| C26 | 25(2)  | 16(2) | 34(2) | 1(2)   | -6(2)  | 4(2)   |
| C27 | 37(2)  | 12(2) | 48(3) | 8(2)   | -4(2)  | -3(2)  |
| C28 | 38(3)  | 31(2) | 38(2) | 16(2)  | 0(2)   | -11(2) |
| C29 | 39(2)  | 30(2) | 22(2) | 7(2)   | 0(2)   | -4(2)  |
| C30 | 27(2)  | 18(2) | 55(3) | 13(2)  | -10(2) | 0(2)   |
| C31 | 33(2)  | 38(3) | 35(2) | 11(2)  | -6(2)  | 3(2)   |
| C32 | 29(2)  | 30(2) | 52(3) | -4(2)  | -15(2) | 0(2)   |
| C33 | 20(2)  | 38(3) | 61(3) | 3(3)   | 5(2)   | 2(2)   |
| C34 | 31(3)  | 30(2) | 55(3) | -11(2) | -4(2)  | 10(2)  |
| C13 | 33(2)  | 45(3) | 25(2) | -1(2)  | -6(2)  | -5(2)  |
| C14 | 52(3)  | 29(2) | 23(2) | -5(2)  | 6(2)   | 0(2)   |
| C15 | 31(2)  | 53(3) | 27(2) | 9(2)   | 9(2)   | 10(2)  |
| C16 | 35(3)  | 34(3) | 35(2) | 11(2)  | 7(2)   | -7(2)  |
| C18 | 15(2)  | 24(2) | 33(2) | -4(2)  | 1(2)   | 1(2)   |
| C17 | 36(2)  | 33(2) | 30(2) | 9(2)   | 4(2)   | 7(2)   |

**Table S5.** Hydrogen coordinates ( $\times 10^4$ ) and isotropic displacement parameters ( $\text{\AA}^2 \times 10^3$ ) for *N*-cobaltocenium-*N'*-phenylthiourea PF<sub>6</sub><sup>-</sup>.

|      | x        | y        | z        | U(eq)  |
|------|----------|----------|----------|--------|
| H1   | 4450(60) | 5440(50) | 4460(20) | 44(16) |
| H2AA | 2830(50) | 4710(50) | 4170(20) | 37(14) |
| H2   | 4989     | 7110     | 3584     | 31     |
| H6   | 6082     | 6597     | 4973     | 34     |
| H5   | 7920     | 7673     | 4873     | 37     |
| H4A  | 6750(60) | 1210(40) | 3370(20) | 39(15) |
| H4   | 8296     | 8449     | 4135     | 34     |
| H9   | -103     | 6480     | 4177     | 32     |
| H10  | -2253    | 5402     | 4066     | 36     |
| H11  | -1529    | 3527     | 4017     | 40     |
| H12  | 1056     | 3455     | 4098     | 33     |
| H3A  | 8410(50) | 1740(30) | 3189(16) | 14(11) |
| H3   | 6818     | 8188     | 3491     | 36     |
| H19  | 9930     | 3035     | 3236     | 36     |
| H20  | 11440    | 4158     | 2899     | 42     |
| H21  | 11592    | 4310     | 2053     | 44     |
| H22  | 10198    | 3349     | 1569     | 51     |
| H23  | 8726     | 2181     | 1897     | 42     |
| H26  | 5693     | -704     | 2419     | 30     |
| H27  | 3687     | -1744    | 2757     | 39     |
| H28  | 2977     | -977     | 3580     | 43     |
| H29  | 4538     | 542      | 3757     | 36     |
| H30  | 4067     | 2179     | 2479     | 40     |
| H31  | 3539     | 763      | 1869     | 42     |
| H32  | 1558     | -270     | 2207     | 44     |
| H33  | 868      | 477      | 3036     | 48     |
| H34  | 2438     | 1995     | 3205     | 47     |
| H13  | 1635     | 5109     | 5355     | 41     |
| H14  | -479     | 6238     | 5365     | 42     |
| H15  | -2567    | 5093     | 5258     | 45     |
| H16  | -1730    | 3261     | 5180     | 42     |
| H17  | 872      | 3272     | 5240     | 40     |

**Table S6.** Torsion angles [°] for *N*-cobaltocenium-*N'*-phenylthiourea PF<sub>6</sub><sup>-</sup>.

---

|                 |           |
|-----------------|-----------|
| C6-C1-N1-C7     | 133.6(5)  |
| C2-C1-N1-C7     | -49.5(6)  |
| C6-C1-C2-C3     | 0.7(7)    |
| N1-C1-C2-C3     | -176.1(4) |
| C1-N1-C7-N2     | 162.8(4)  |
| C1-N1-C7-S1     | -18.0(6)  |
| C8-N2-C7-N1     | 169.1(4)  |
| C8-N2-C7-S1     | -10.1(6)  |
| C2-C1-C6-C5     | -0.9(7)   |
| N1-C1-C6-C5     | 175.9(4)  |
| C1-C6-C5-C4     | 0.2(7)    |
| C6-C5-C4-C3     | 0.7(7)    |
| C7-N2-C8-C9     | -6.0(8)   |
| C7-N2-C8-C12    | 178.2(4)  |
| C7-N2-C8-Co1    | -98.3(5)  |
| N2-C8-C9-C10    | -179.2(5) |
| C12-C8-C9-C10   | -3.0(5)   |
| Co1-C8-C9-C10   | -59.1(3)  |
| N2-C8-C9-Co1    | -120.1(5) |
| C12-C8-C9-Co1   | 56.1(3)   |
| C8-C9-C10-C11   | 1.9(5)    |
| Co1-C9-C10-C11  | -59.0(3)  |
| C8-C9-C10-Co1   | 60.9(3)   |
| C9-C10-C11-C12  | -0.1(6)   |
| Co1-C10-C11-C12 | -60.0(3)  |
| C9-C10-C11-Co1  | 59.9(3)   |
| C10-C11-C12-C8  | -1.8(6)   |
| Co1-C11-C12-C8  | -61.3(3)  |
| C10-C11-C12-Co1 | 59.5(3)   |
| N2-C8-C12-C11   | 179.7(4)  |
| C9-C8-C12-C11   | 3.0(5)    |
| Co1-C8-C12-C11  | 59.6(3)   |
| N2-C8-C12-Co1   | 120.0(4)  |
| C9-C8-C12-Co1   | -56.7(3)  |

|                 |           |
|-----------------|-----------|
| C1-C2-C3-C4     | 0.2(7)    |
| C5-C4-C3-C2     | -0.9(7)   |
| C18-C19-C20-C21 | 0.3(7)    |
| C19-C20-C21-C22 | 0.4(7)    |
| C20-C21-C22-C23 | -1.5(8)   |
| C21-C22-C23-C18 | 1.8(8)    |
| C18-N3-C24-N4   | -171.3(4) |
| C18-N3-C24-S2   | 9.3(7)    |
| C25-N4-C24-N3   | -173.8(4) |
| C25-N4-C24-S2   | 5.6(6)    |
| C24-N4-C25-C26  | 27.3(7)   |
| C24-N4-C25-C29  | -156.4(4) |
| C24-N4-C25-Co2  | -68.7(6)  |
| N4-C25-C26-C27  | 174.5(4)  |
| C29-C25-C26-C27 | -2.2(5)   |
| Co2-C25-C26-C27 | -59.1(3)  |
| N4-C25-C26-Co2  | -126.3(4) |
| C29-C25-C26-Co2 | 56.9(3)   |
| C25-C26-C27-C28 | 1.5(5)    |
| Co2-C26-C27-C28 | -59.1(3)  |
| C25-C26-C27-Co2 | 60.6(3)   |
| C26-C27-C28-C29 | -0.2(5)   |
| Co2-C27-C28-C29 | -59.8(3)  |
| C26-C27-C28-Co2 | 59.6(3)   |
| C27-C28-C29-C25 | -1.2(5)   |
| Co2-C28-C29-C25 | -60.5(3)  |
| C27-C28-C29-Co2 | 59.4(3)   |
| N4-C25-C29-C28  | -175.0(4) |
| C26-C25-C29-C28 | 2.1(5)    |
| Co2-C25-C29-C28 | 59.1(3)   |
| N4-C25-C29-Co2  | 125.9(4)  |
| C26-C25-C29-Co2 | -57.0(3)  |
| C34-C30-C31-C32 | 1.8(5)    |
| Co2-C30-C31-C32 | 60.2(3)   |
| C34-C30-C31-Co2 | -58.4(3)  |
| C30-C31-C32-C33 | -1.8(6)   |



|                 |           |
|-----------------|-----------|
| Co2-C31-C32-C33 | 58.3(4)   |
| C30-C31-C32-Co2 | -60.1(3)  |
| C31-C32-C33-C34 | 1.1(6)    |
| Co2-C32-C33-C34 | 59.4(4)   |
| C31-C32-C33-Co2 | -58.3(3)  |
| C31-C30-C34-C33 | -1.1(5)   |
| Co2-C30-C34-C33 | -59.7(4)  |
| C31-C30-C34-Co2 | 58.6(3)   |
| C32-C33-C34-C30 | 0.0(6)    |
| Co2-C33-C34-C30 | 59.9(3)   |
| C32-C33-C34-Co2 | -59.9(3)  |
| C17-C13-C14-C15 | 0.5(5)    |
| Co1-C13-C14-C15 | 59.6(3)   |
| C17-C13-C14-Co1 | -59.1(3)  |
| C13-C14-C15-C16 | -0.4(5)   |
| Co1-C14-C15-C16 | 58.8(3)   |
| C13-C14-C15-Co1 | -59.1(3)  |
| C14-C15-C16-C17 | 0.0(5)    |
| Co1-C15-C16-C17 | 58.9(3)   |
| C14-C15-C16-Co1 | -58.8(3)  |
| C20-C19-C18-C23 | 0.0(7)    |
| C20-C19-C18-N3  | -179.7(4) |
| C22-C23-C18-C19 | -1.0(7)   |
| C22-C23-C18-N3  | 178.6(5)  |
| C24-N3-C18-C19  | 170.3(4)  |
| C24-N3-C18-C23  | -9.4(7)   |
| C14-C13-C17-C16 | -0.5(5)   |
| Co1-C13-C17-C16 | -59.9(3)  |
| C14-C13-C17-Co1 | 59.4(3)   |
| C15-C16-C17-C13 | 0.3(5)    |
| Co1-C16-C17-C13 | 59.8(3)   |
| C15-C16-C17-Co1 | -59.5(3)  |

## Computed transition structure

B3LYP/6-31G(d,p) = -3194.566046, zero-point energy (unscaled) = 0.483081, imaginary frequency = 266i

|    |    |   |           |           |           |
|----|----|---|-----------|-----------|-----------|
| 1  | 6  | 0 | 4.795616  | -0.565510 | -1.742611 |
| 2  | 6  | 0 | 3.835369  | 0.444864  | -1.433278 |
| 3  | 6  | 0 | 2.590039  | -0.200941 | -1.121306 |
| 4  | 6  | 0 | 2.844464  | -1.620210 | -1.126830 |
| 5  | 6  | 0 | 4.184526  | -1.840564 | -1.555831 |
| 6  | 1  | 0 | 5.819464  | -0.384599 | -2.039907 |
| 7  | 1  | 0 | 3.992092  | 1.511267  | -1.433889 |
| 8  | 1  | 0 | 2.103669  | -2.371176 | -0.886484 |
| 9  | 1  | 0 | 4.657794  | -2.803837 | -1.686388 |
| 10 | 6  | 0 | 4.502273  | -1.950905 | 1.817990  |
| 11 | 6  | 0 | 3.514354  | -0.953665 | 2.095076  |
| 12 | 6  | 0 | 5.710813  | -1.286246 | 1.455339  |
| 13 | 1  | 0 | 4.353653  | -3.021139 | 1.860635  |
| 14 | 6  | 0 | 4.106820  | 0.323488  | 1.890724  |
| 15 | 1  | 0 | 2.484054  | -1.139403 | 2.365750  |
| 16 | 6  | 0 | 5.463081  | 0.117181  | 1.486063  |
| 17 | 1  | 0 | 6.638088  | -1.763578 | 1.169705  |
| 18 | 1  | 0 | 3.601181  | 1.278133  | 1.946877  |
| 19 | 1  | 0 | 6.168888  | 0.894081  | 1.226270  |
| 20 | 6  | 0 | 0.967167  | 1.616540  | -0.570790 |
| 21 | 16 | 0 | 2.041153  | 2.858693  | -0.219324 |
| 22 | 7  | 0 | -0.380777 | 1.715891  | -0.635977 |
| 23 | 1  | 0 | -0.882533 | 0.891437  | -0.993117 |
| 24 | 6  | 0 | -1.211687 | 2.843159  | -0.400787 |
| 25 | 6  | 0 | -2.308640 | 3.010044  | -1.257891 |
| 26 | 6  | 0 | -1.024728 | 3.723107  | 0.671425  |
| 27 | 6  | 0 | -3.208835 | 4.053329  | -1.047388 |
| 28 | 1  | 0 | -2.439905 | 2.327607  | -2.092505 |
| 29 | 6  | 0 | -1.928917 | 4.766140  | 0.869497  |
| 30 | 1  | 0 | -0.181789 | 3.594152  | 1.336849  |
| 31 | 6  | 0 | -3.021605 | 4.937546  | 0.017142  |
| 32 | 1  | 0 | -4.047973 | 4.182669  | -1.724327 |
| 33 | 1  | 0 | -1.776093 | 5.448822  | 1.699774  |
| 34 | 1  | 0 | -3.716190 | 5.756219  | 0.176699  |
| 35 | 7  | 0 | 1.356457  | 0.297971  | -0.829599 |
| 36 | 1  | 0 | 0.626452  | -0.435510 | -0.732976 |
| 37 | 7  | 0 | -1.480614 | -1.727687 | -1.068971 |
| 38 | 8  | 0 | -0.364884 | -1.857595 | -0.459699 |
| 39 | 8  | 0 | -1.808574 | -0.609044 | -1.573308 |
| 40 | 6  | 0 | -2.292718 | -2.809081 | -1.184295 |
| 41 | 1  | 0 | -1.914376 | -3.705583 | -0.717044 |
| 42 | 6  | 0 | -3.536209 | -2.703397 | -1.868458 |
| 43 | 1  | 0 | -3.587030 | -1.841706 | -2.529165 |
| 44 | 1  | 0 | -3.878635 | -3.618666 | -2.345974 |
| 45 | 27 | 0 | 4.184924  | -0.785215 | 0.168631  |
| 46 | 6  | 0 | -5.042016 | -2.295784 | -0.839516 |
| 47 | 1  | 0 | -5.738609 | -2.127996 | -1.656247 |
| 48 | 6  | 0 | -4.738979 | -1.221050 | 0.133818  |
| 49 | 6  | 0 | -4.563159 | -1.830125 | 1.389195  |
| 50 | 6  | 0 | -4.568970 | 0.159153  | 0.025718  |
| 51 | 6  | 0 | -4.222846 | -1.133822 | 2.545445  |
| 52 | 6  | 0 | -4.241987 | 0.881817  | 1.172968  |
| 53 | 1  | 0 | -4.679162 | 0.663430  | -0.927721 |
| 54 | 6  | 0 | -4.067894 | 0.244393  | 2.412853  |
| 55 | 1  | 0 | -4.094534 | -1.631123 | 3.501341  |
| 56 | 1  | 0 | -4.110447 | 1.956193  | 1.102801  |
| 57 | 1  | 0 | -3.810947 | 0.836282  | 3.285050  |
| 58 | 7  | 0 | -4.844082 | -3.203416 | 1.223412  |
| 59 | 6  | 0 | -5.219378 | -3.464036 | -0.024843 |
| 60 | 1  | 0 | -5.501233 | -4.462901 | -0.330646 |
| 61 | 1  | 0 | -4.802225 | -3.890105 | 1.966192  |

## References

- (S1) A. D. Becke, Density-Functional Thermochemistry. III. The Role of Exact Exchange, *J. Chem. Phys.* 1993, **98**, 5648-5652.
- (S2) C. T. Lee, W. T. Yang, and R. G. Parr, Development of the Colle-Salvetti Correlation-Energy Formula Into A Functional of the Electron Density, *Phys. Rev. B* 1988, **37**, 785-789.
- (S3) M. J. Frisch, G. W. Trucks, H. B. Schlegel, G. E. Scuseria, M. A. Robb, J. R. Cheeseman, G. Scalmani, V. Barone, G. A. Petersson, H. Nakatsuji, X. Li, M. Caricato, A. V. Marenich, J. Bloino, B. G. Janesko, R. Gomperts, B. Mennucci, H. P. Hratchian, J. V. Ortiz, A. F. Izmaylov, J. L. Sonnenberg, D. Williams-Young, F. Ding, F. Lipparini, F. Egidi, J. Goings, B. Peng, A. Petrone, T. Henderson, D. Ranasinghe, V. G. Zakrzewski, J. Gao, N. Rega, G. Zheng, W. Liang, M. Hada, M. Ehara, K. Toyota, R. Fukuda, J. Hasegawa, M. Ishida, T. Nakajima, Y. Honda, O. Kitao, H. Nakai, T. Vreven, K. Throssell, J. A. Montgomery, Jr., J. E. Peralta, F. Ogliaro, M. J. Bearpark, J. J. Heyd, E. N. Brothers, K. N. Kudin, V. N. Staroverov, T. A. Keith, R. Kobayashi, J. Normand, K. Raghavachari, A. P. Rendell, J. C. Burant, S. S. Iyengar, J. Tomasi, M. Cossi, J. M. Millam, M. Klene, C. Adamo, R. Cammi, J. W. Ochterski, R. L. Martin, K. Morokuma, O. Farkas, J. B. Foresman, and D. J. Fox, *Gaussian 16*, Revision C.01; Gaussian, Inc., Wallingford CT, 2019.
- (S4) APEX2, Bruker Analytical X-ray Systems, Madison, WI (2004).
- (S5) SADABS, Bruker Analytical X-ray Systems, Madison, WI (2004).
- (S6) SAINT Bruker Analytical X-ray Systems, Madison, WI (2004).
- (S7) SHELXTL 2008, Bruker Analytical X-Ray Systems, Madison, WI (2008); G. M. Sheldrick, A Short History of SHELX, *Acta Cryst.* 2008, **A64**, 112-122.
- (S8) SHELXL 2016/6; G. M. Sheldrick, Crystal Structure Refinement with SHELXL, *Acta Cryst.* 2015, **C71**, 3-8.
- (S9) A. L. Spek, Structure Validation in Chemical Crystallography, *Acta. Cryst.* 2009, **D65**, 148-155. PLATON, A Multipurpose Crystallographic Tool, Utrecht University, Utrecht, The Netherlands.
